# Collagen (I) homotrimer potentiates the osteogenesis imperfecta (oim) mutant allele and reduces survival in male mice

Katie J. Lee <sup>a</sup>, Lisa Rambault <sup>b</sup>, George Bou-Gharios <sup>a</sup>, Peter D. Clegg <sup>a, c</sup>, Riaz Akhtar <sup>d</sup>, Gabriela Czanner <sup>e</sup>, Rob van 't Hof <sup>a</sup>, Elizabeth G. Canty-Laird <sup>a, c</sup>

<sup>a</sup> Department of Musculoskeletal and Ageing Science, Institute of Life Course and Medical Sciences, University of Liverpool, William Henry Duncan Building, 6 West Derby Street, Liverpool, L7 8TX, United Kingdom

<sup>b</sup> Université de Poitiers, France

<sup>c</sup> The Medical Research Council Versus Arthritis Centre for Integrated Research into Musculoskeletal Ageing (CIMA)

<sup>d</sup> Department of Mechanical, Materials and Aerospace Engineering, School of Engineering, University of Liverpool, L69 3GH, United Kingdom

<sup>e</sup> School of Computer Science and Mathematics, Faculty of Engineering and Technology, Liverpool John Moores University, Byrom Street, Liverpool, L3 3AF, United Kingdom

## Abstract

Type I collagen is the major structural component of bone where it exists as an  $(\alpha 1)_2(\alpha 2)_1$  heterotrimer in all vertebrates. The osteogenesis imperfecta (oim) mouse model comprising solely homotrimeric  $(\alpha 1)_3$  type I collagen, due to a dysfunctional  $\alpha 2$  chain, has a brittle bone phenotype implying that the heterotrimeric form is required for physiological bone function. However, humans with rare null alleles preventing synthesis of the  $\alpha 2$  chain have connective tissue and cardiovascular abnormalities (cardiac valvular Ehlers Danlos Syndrome), without evident bone fragility. Conversely a prevalent human single nucleotide polymorphism leading to increased homotrimer synthesis is associated with osteoporosis. Whilst the oim line is well-studied, whether homotrimeric type I collagen is functionally equivalent to the heterotrimeric form in bone has not been demonstrated. Col1a2 null and oim mouse lines were used in this study and bones analysed by microCT and 3-point bending. RNA was also extracted from heterozygote tissues and allelic discrimination analyses performed using qRT-PCR. Here we comprehensively show for the first time that mice lacking the  $\alpha 2(I)$  chain do not have impaired bone biomechanical or structural properties, unlike oim homozygous mice. However Mendelian inheritance was affected in male mice of both lines and male mice null for the  $\alpha 2$  chain exhibited age-related loss of condition. The brittle bone phenotype of oim homozygotes could result from detrimental effects of the oim mutant allele, however, the phenotype of oim heterozygotes is known to be less severe. We used allelic discrimination to show that the oim mutant allele is not downregulated in heterozygotes. We then tested whether gene dosage was responsible for the less severe phenotype of oim heterozygotes by generating compound heterozygotes. Data showed that compound heterozygotes had impaired bone structural properties as compared to oim heterozygotes, albeit to a lesser extent than oim homozygotes. Hence, we concluded that the presence of heterotrimeric collagen-1 in oim heterozygotes alleviates the effect of the oim mutant allele but a genetic interaction between homotrimeric collagen-1 and the oim mutant allele leads to bone fragility.

**Key words:** collagen, homotrimer, Col1a2,  $\alpha 2(I)$ , osteogenesis imperfecta, cvEDS

## 46 Introduction

47  
48 Type I collagen is the major structural component of vertebrate tissues, where it exists as insoluble  
49 fibrils formed from arrays of trimeric collagen molecules. In tetrapods, type I collagen molecules are  
50 predominantly  $(\alpha 1)_2(\alpha 2)_1$  heterotrimers derived from the polypeptide gene products of the Col1a1 and  
51 Col1a2 genes. Trimeric type I procollagen molecules contain a central triple-helical domain flanked by  
52 globular N- and C-propeptide regions, that are proteolytically removed to facilitate fibrillogenesis (1).  
53 Procollagen molecules are synthesised in the endoplasmic reticulum of the secretory pathway where  
54 individual molecules first associate via the C-propeptides. C-propeptide association facilitates chain  
55 registration and folding of the triple helical domain into a right-handed triple helix. The type-specific  
56 assembly of fibrillar procollagens has been attributed to defined amino acid sequences within the C-  
57 propeptide including a chain recognition sequence (2), specific stabilising residues (3) and a cysteine  
58 code (4), although none fully explain the preferential heterotrimerisation of type I procollagen.

59 Abnormal type I collagen  $(\alpha 1)_3$  homotrimer, derived from COL1A1 alone, is genetically or  
60 biochemically associated with common age-related human diseases including osteoporosis (5),  
61 osteoarthritis (6-8), intervertebral disc degeneration (9), arterial stiffening (10), cancer (11), liver  
62 fibrosis (12) and Dupuytren's contracture (13). The homotrimeric form is resistant to mammalian  
63 collagenases (14) and alterations in collagen crosslinking have been reported in the osteogenesis  
64 imperfecta murine (oim) model, which lacks a functional  $\alpha 2(I)$  chain (15-17). Hence the presence of  
65 homotrimeric collagen (I) in human disease may alter the ability of tissues to respond to changing  
66 physiological demands by slowing remodelling and altering tissue mechanics.

67 The oim mutation is a deletion of a single guanidine residue, causing a frameshift that alters the  
68 last 47 amino acids, and reportedly adds an additional residue to the  $\alpha 2$  chain of type I procollagen (Fig.  
69 1A). The mutant  $\alpha 2$  chain cannot be incorporated into trimers hence giving rise to solely homotrimeric  
70 collagen-1 in oim homozygotes. Homozygous oim/oim mice have osteopenia, progressive skeletal  
71 deformities, spontaneous fractures, cortical thinning and small body size (18) with corresponding  
72 alterations to bone structure and material properties (19, 20). Homozygous oim mice also have a  
73 reduced circumferential breaking strength and greater compliance of aortae (16, 21), reduced ultimate  
74 stress and strain tendon for tendon (22) and kidney glomerulopathy (23).

75 The oim mutation is very similar to the first-identified mutation causing human osteogenesis  
76 imperfecta (autosomal recessive Silence type III), in which a 4 nucleotide deletion (c.4001\_4004del)  
77 causes a frameshift (p.(Asn1334Serfs\*34)) to alter the last 33 amino acids of the  $\alpha 2$  chain of type I  
78 procollagen (Pihlajaniemi et al., 1984). The human mutation also results in homotrimeric type I collagen  
79 synthesis as the defective  $\alpha 2(I)$  chain cannot be incorporated into trimers (24, 25). In two additional  
80 patients with mild osteogenesis imperfecta, novel mutations were identified causing a 48 amino acid  
81 truncation of the  $\alpha 2$  chain and a substitution of a cysteine residue important for interchain disulphide  
82 bonding respectively (26). In these cases the  $\alpha 2$  chain was again synthesised but not incorporated into  
83 trimers. A similar mutation causing severe osteogenesis imperfecta in a Beagle dog was caused by a  
84 heterozygous 9 nucleotide replacement of a 4 nucleotide stretch, leading to a 37 residue truncation of  
85 the  $\alpha 2$  chain and alteration of the final 44 amino acids of the truncated polypeptide (Campbell et al.,  
86 2001).

87 Oim heterozygotes do not show spontaneous fractures but appear to have a bone phenotype  
88 intermediate between that of wild-type and homozygous mice (20, 27-29). Similarly the parents of the  
89 human proband had no history or evidence of fractures but had a marked decrease in bone mass (30).

90 The osteogenesis imperfecta brittle bone phenotype, and the genetic association of collagen (I)  
91 homotrimer with osteoporosis (5, 31) contrasts with the phenotype of human patients in which

92 mutations leading to nonsense-mediated decay of the COL1A2 mRNA cause a specific cardiac valvular  
93 form of Ehlers-Danlos syndrome (cv-EDS), not involving bone (32, 33) and evidence that Col1a2  
94 silencing does not affect *in vitro* osteoblast mineralisation (34). EDS is generally characterised by  
95 hyperextensible skin and joint hypermobility. In cv-EDS patients the  $\alpha 2$  chain of type I collagen is not  
96 synthesised, therefore all type I collagen molecules would be homotrimeric. It has been hypothesised  
97 that the phenotypic differences between the OI and cv-EDS patients could be explained by the cellular  
98 stress elicited by the presence of misfolded  $\alpha 2(I)$  procollagen chains in osteogenesis imperfecta (26, 35,  
99 36), having a particularly detrimental effect on bone. Cellular stress has been implicated in human  
100 osteogenesis imperfecta caused by substitutions in the C-propeptide of the  $\alpha 1(I)$  chain (37), in mouse  
101 models of triple-helical region mutations; Aga2 (90 a.a. extension to the  $\alpha 1(I)$  chain) (38), Brl IV (G349C  
102 in  $\alpha 1(I)$ ) (39) and Amish (G610C in  $\alpha 2(I)$ ), identical to that found in a human kindred) (40), as well as in  
103 the zebrafish model Chihuahua (G574D in  $\alpha 1(I)$ ) (41).

104 In this study we compared the bone phenotype of the oim model to that of a Col1a2 null  
105 mouse. We considered that comparing the oim model to that of a Col1a2 null line provided a unique  
106 opportunity to distinguish between the intracellular and extracellular effects of a collagen mutation  
107 linked to brittle bone disease, as well as to elucidate the effect of collagen (I) homotrimer on bone  
108 structure and mechanics. Specifically, we compared the bone phenotype of oim homozygous and  
109 heterozygous mutant mice with that of mice containing 1 or 2 copies of a targeted Col1a2 null allele  
110 and wild-type controls, in order to determine the contribution of collagen (I) homotrimer to bone  
111 fragility.

112  
113

## 114 Results

115

### 116 Tm1b homozygotes lack the $\alpha 2(I)$ collagen chain in bone and tendon

117 To verify lack of the  $\alpha 2(I)$  chain in tm1b homozygotes, tendon and bone samples from 8 week old mice  
118 were labelled with [ $^{14}\text{C}$ ]proline to detect newly synthesised collagen (I). SDS-PAGE analysis of labelled  
119 tissue extracts verified lack of  $\alpha 2(I)$  chain synthesis in tail tendon, bone and patellar tendon (Fig. 1C).

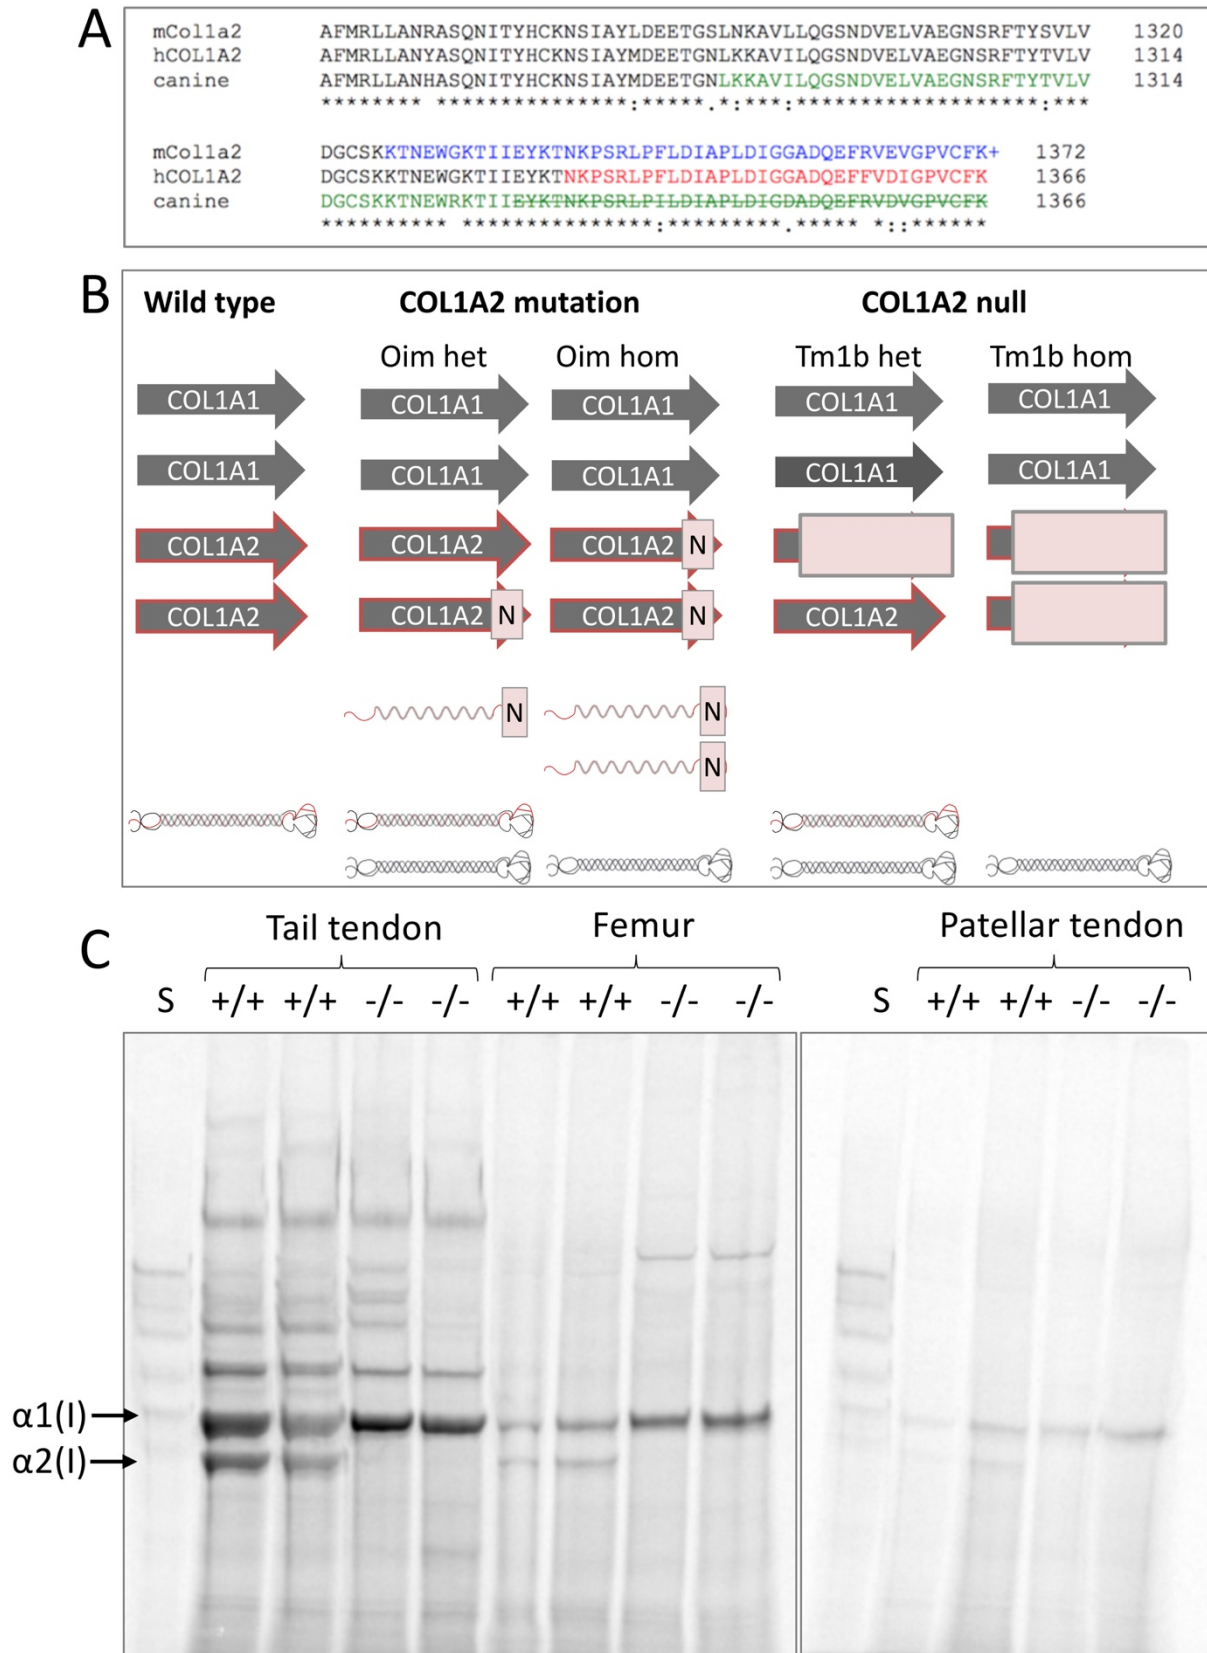

120  
121  
122  
123  
124  
125

**Figure 1. Col1a2 mutant and null alleles.** A: Amino acid sequence alignment for the final 112 residues of the mouse (mCol1a2), human (hCOL1A2) and canine  $\alpha 2(I)$  collagen chains. Colour change indicates amino acid sequence changed from that shown due to frameshift caused by the oim or equivalent

126 mutation. + indicates reported additional amino acid (18). Strike-through indicates truncation. B:  
127 Genetic differences between the oim and Col1a2 null lines with implications for collagen (I) protein  
128 synthesis. Arrows indicate COL1 genes; N indicates mutation, light red box indicates null allele. Folded  
129 heterotrimeric proteins are indicated in black and red, whilst homotrimers are in black only. The  
130 presence of unincorporated mutant Col1a2 allele is indicated as a red waveform with a mutation (N). C:  
131 Tendon and bone tissue from Tm1b wild-type (+/+) and homozygote (-/-) mice were labelled with  
132 [<sup>14</sup>C]proline and analysed by delayed reduction SDS-PAGE. No labelled  $\alpha 2(I)$  chain was present in tm1b  
133 homozygotes (-/-) unlike in wild-type controls (+/+) indicating that tm1b homozygotes are Col1a2 null.  
134 S; collagen standard.  $\alpha 1(I)$  and  $\alpha 2(I)$  chains are indicated.

135

#### 136 **Alterations to Mendelian inheritance in male mice of the oim and Col1a2 null lines**

137 To determine if either the oim or Col1a2 alleles resulted in loss of mice prior to weaning, a chi-squared  
138 test was performed on genotype data for Col1a2 null and oim mice. There were significant differences  
139 between the observed and expected genotype percentages for male mice of both lines (oim;  $p=0.01$ ,  
140 Col1a2 null;  $p=0.033$ ), whereas no differences were seen for female mice of either line (Fig. 2 A-B). For  
141 oim males there was an 10.0% increase in wild-types, a 6.2% decrease in heterozygotes and a 3.8%  
142 decrease in homozygotes; whereas for Col1a2 null males there was an 8.0% increase in wild-types, a  
143 9.6% decrease in heterozygotes and a 1.6% increase in homozygotes. Hence increased numbers of male  
144 wild-types and reduced numbers of male heterozygotes were observed for both lines. Conversely the  
145 data supported Mendelian inheritance in female mice.

146

#### 147 **Spontaneous fractures were observed solely in oim homozygotes, whilst male Col1a2 null** 148 **homozygotes exhibited mild joint swelling.**

149 During colony maintenance it was noticeable that spontaneous fractures occurred in the oim line, but  
150 not in the Col1a2 null line. Mildly swollen ankle joints were however observed in male tm1b mice which  
151 was initially attributed to fighting. The proportion of mice with swollen joints, or noticeable fractures  
152 with swelling were determined, including those requiring analgesia (Fig. 2 C-D). Male mice  
153 demonstrated a more severe phenotype than female mice for both the Col1a2 null and oim lines. For  
154 the oim line fractures and associated swelling were observed in homozygous mice only, with an  
155 incidence of 47% for males (20 out of 43) and 20% (10 out of 50) for females. 26% of male mice (11 out  
156 of 43) and 18% of female mice (9 out of 50) received analgesic medication. Swollen joints alone  
157 presented in 6% of male oim heterozygotes (5 out of 89), 2% of male oim homozygotes (1 out of 43)  
158 and 2% of female oim homozygotes (1 out of 50). For the Col1a2 null line no bone fractures were  
159 observed and no analgesia was required to be administered. Swollen joints were observed  
160 predominantly in male homozygotes with an incidence of 23% (19 out of 83). Less than 4% of male wild-  
161 type (4 out of 103), heterozygous (4 out of 126) and female homozygous (1 out of 56) mice presented  
162 with swollen joints. No female wild-type or heterozygous mice were reported to have swollen joints.  
163 For mouse weights recorded after euthanasia at 18 weeks, male and female oim homozygotes were  
164 22.7% and 20.0% lighter than wild-types (Fig. 2E). Heterozygotes were of intermediate weight with  
165 male homozygotes being 17.1% lighter than male heterozygotes and female heterozygotes being 13.6%  
166 lighter than wild-types. In contrast, there were no significant differences in weight between genotypes  
167 for the Col1a2 null line (Fig. 2F).

168

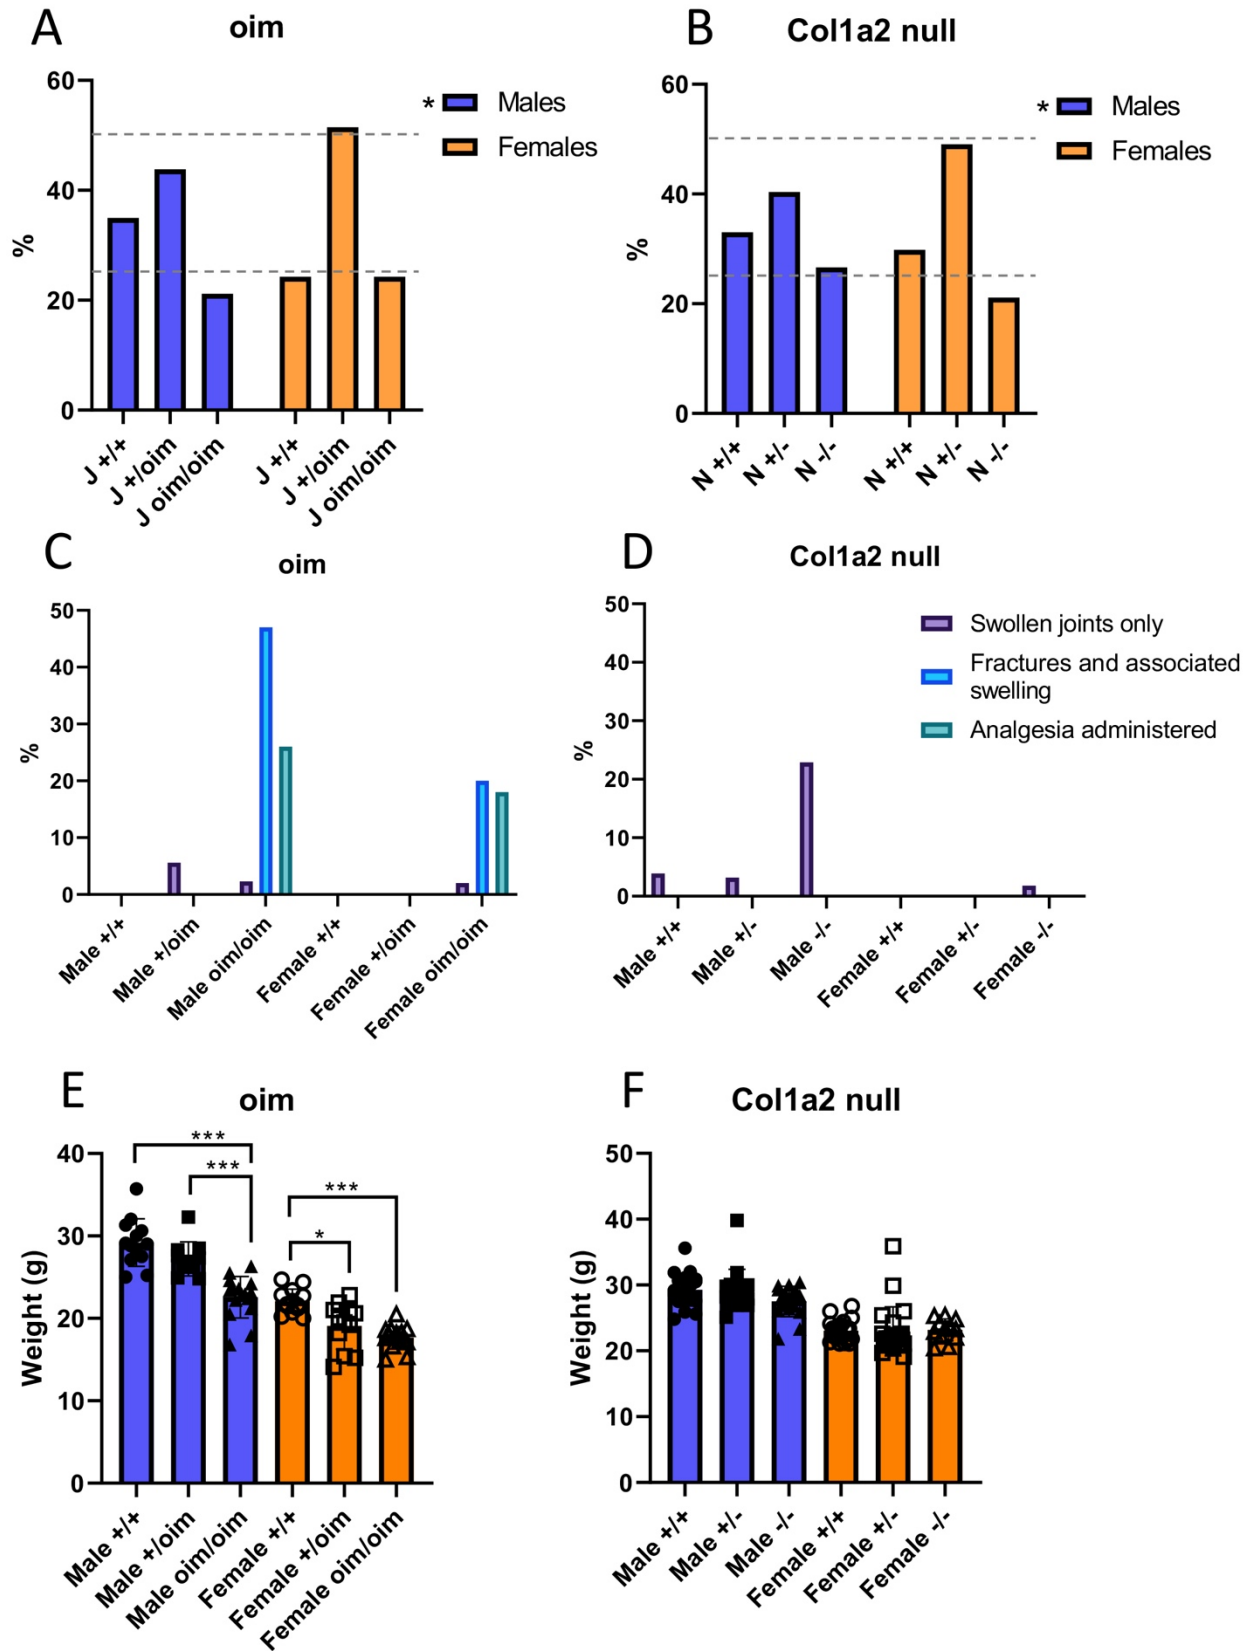

169  
170  
171  
172  
173  
174  
175

**Figure 2. Inheritance pattern, musculoskeletal health summary and mouse weights for the oim and Col1a2 null lines.** A-B: The percentage of mice of each genotype born to heterozygous parents for the oim (A) and Col1a2 null (B) lines. A chi-squared test showed significant differences between observed inheritance and expected Mendelian inheritance (25%, 50%, 25%; dashed grey lines) for male mice of both lines. C-D: The number of mice suffering from swollen joints and bone fractures as well as those

176 treated with analgesics were recorded for the oim (C) and Col1a2 null (D) lines. These numbers are  
177 expressed as a percentage of total mouse numbers. A-D: n=71, 89 and 43 for male oim +/+, +/oim and  
178 oim/oim mice respectively; n=50, 106 and 50 for female oim +/+, +/oim and oim/oim mice respectively;  
179 n= 103, 126 and 83 for male Col1a2 null +/+, +/-, -/- mice respectively and; n=79, 130, 56 for female  
180 Col1a2 null +/+, +/-, -/- mice respectively. Swollen joints were mild in the Col1a2 null line and often not  
181 noted until advanced age, therefore the numbers shown above may be an underestimation due to  
182 many mice being culled at earlier time points. E-F: Weights of 18 week oim (E) and Col1a2 null (F) mice  
183 measured after euthanasia. Blue bars/filled shapes = males, orange bars/open shapes = females. \* p-  
184 value < 0.05 and \*\*\* p-value <0.001. E: p-value for genotype <0.001 for males and females. E-F: n= 13,  
185 11 and 16 for male oim male +/+, +/oim and oim/oim mice respectively, n=13, 12 and 15 for female oim  
186 +/+, +/oim and oim/oim mice respectively, n= 21, 17 and 17 for male Col1a2 null +/+, +/-, -/- mice  
187 respectively, n=21, 22, 12 for female Col1a2 null +/+, +/-, -/- mice respectively.

188

189

### 190 **Cortical bone analysis and three-point bending of bones from oim and Col1a2 null mice**

191 Cortical thickness was significantly decreased in oim homozygotes; by 33% in 8 week males (Fig. 3A)  
192 and to a lesser extent at 18 weeks (22%) (Fig. 3F) and in females (14%; 8 wks, 20%; 18 wks). At 8 weeks  
193 cortical thickness in oim heterozygotes was intermediate between that of wild-types and oim  
194 homozygotes (a 20% reduction in males and 10% in females). At 18 weeks, but not significantly at 8 or  
195 52 weeks, cortical thickness was also reduced in Col1a2 null homozygotes (18% in males and 10% in  
196 females). For oim homozygotes and heterozygotes polar moment of inertia was reduced at 8 weeks  
197 (Fig. 3B) in both males (65% and 42% respectively) and females (36% and 26% respectively), and at 18  
198 weeks (Fig. 3G) in males (42% and 29% respectively), indicative of a reduced resistance to torsional  
199 loading. In contrast, this parameter was increased by 31% in male 8 week Col1a2 null homozygotes (Fig.  
200 3B) as compared to their control (N +/+) (though not above the level of the oim wild-type control (J  
201 +/+)), and at 52 weeks in females by 30% as compared to heterozygotes (Fig. 3L). Periosteal  
202 circumference was decreased by 25% and 17% in male oim homozygotes and heterozygotes  
203 respectively at 8 weeks (Fig. 3C). However both periosteal (Fig. 3M) and endosteal circumference (Fig.  
204 3N) increased in female Col1a2 null homozygotes at 52 weeks (by 9% and 16%), mirroring the same  
205 trend in males. Tissue mineral density was significantly higher in oim wild-types than the other  
206 genotypes at 8 weeks (Fig. 3E), but lower in male wild-types at 52 weeks (Fig. 3O).

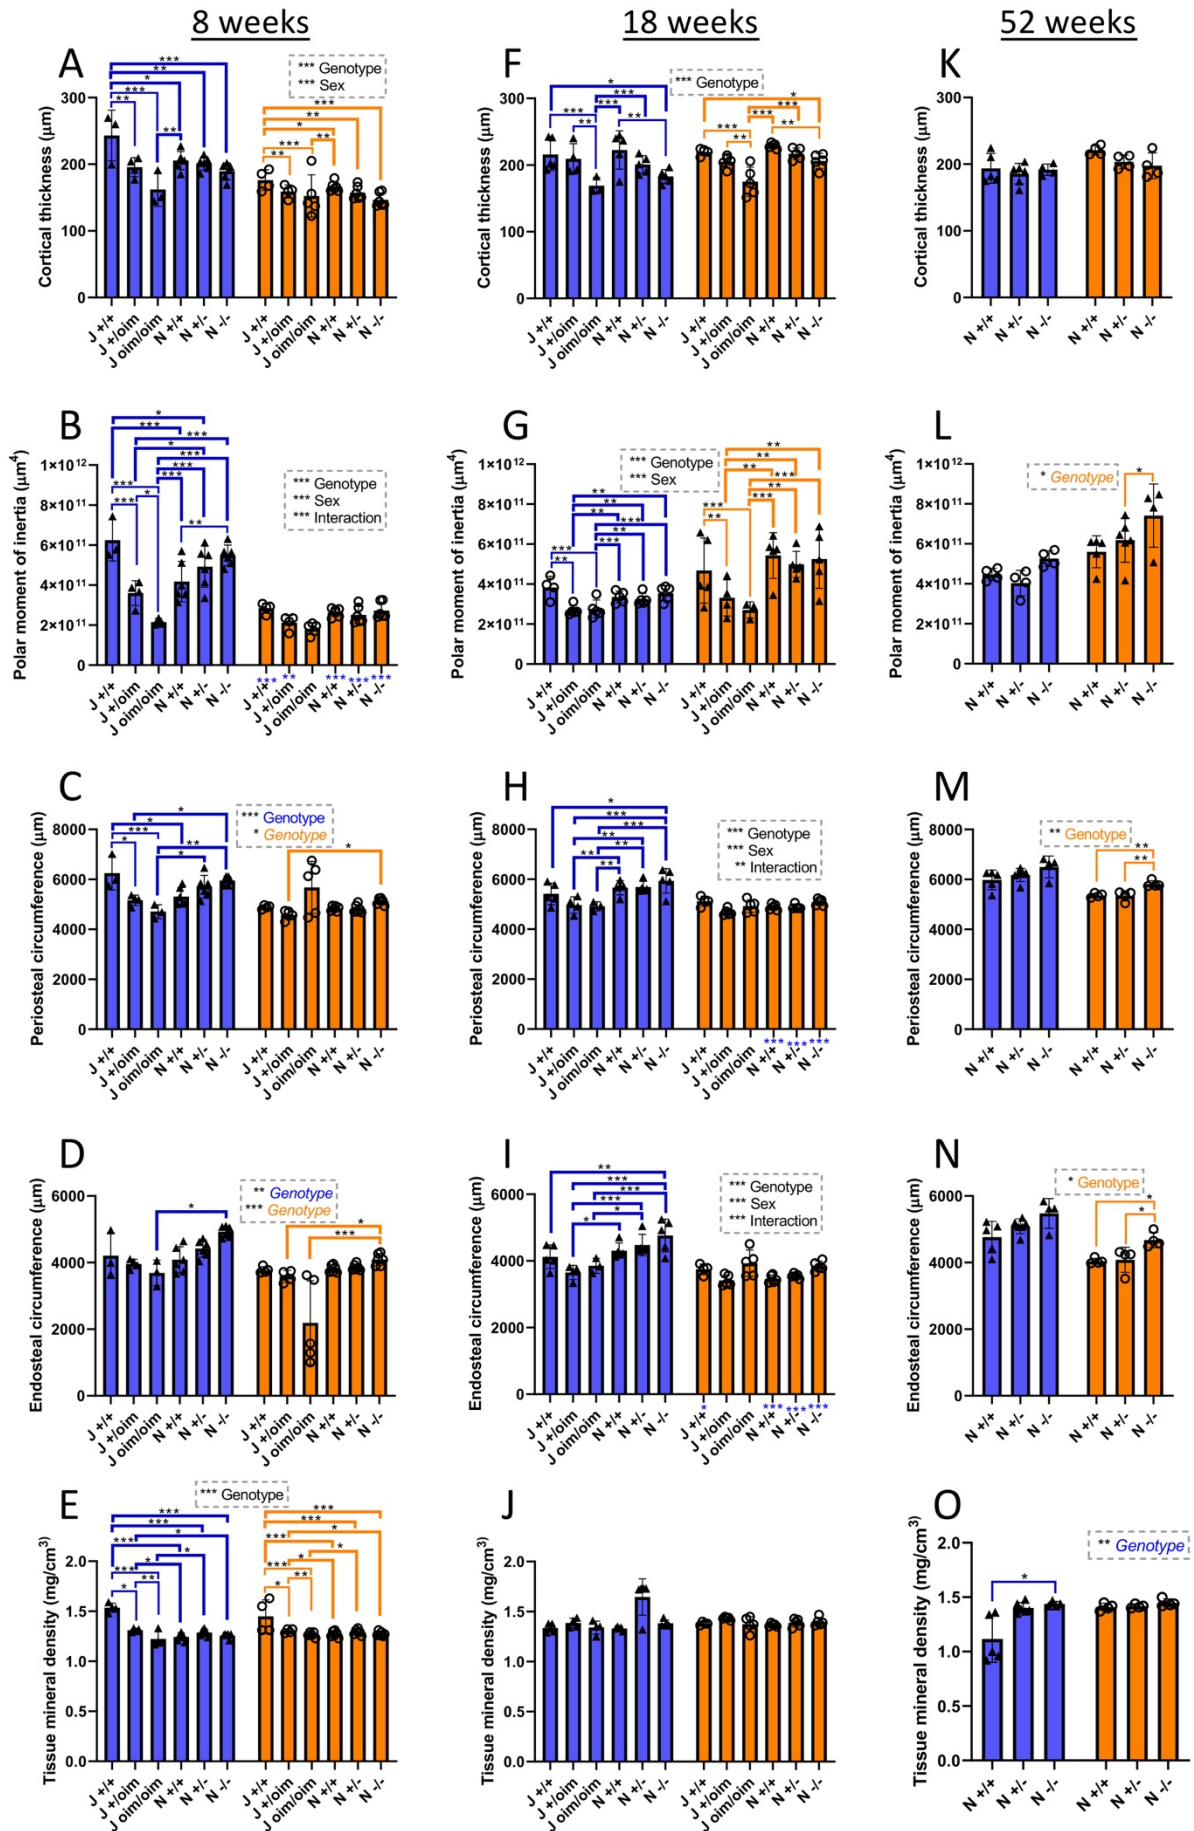



208  
209 **Figure 3. Femoral cortical bone analyses of oim and Col1a2 null mice.** MicroCT scans were performed  
210 on the femur of oim and Col1a2 null mice at 8 (A-E), 18 (F-J) and 52 weeks (K-O). Reconstruction and  
211 analysis of scan files enabled determination of cortical thickness (A, F, K), polar moment of inertia (B, G,  
212 L), periosteal (C, H, M), and endosteal (D, I, N) circumference, as well as bone density (E, J, O). Blue  
213 bars/triangles = males, orange bars/circles = females. Thin blue (male) and orange (female) brackets  
214 show differences between genotypes within mouse lines and thick brackets between lines.  
215 Male/female differences for particular genotypes are shown below the x-axis for females (blue stars). \*  
216 p-value < 0.05, \*\* p-value < 0.01 and \*\*\* p-value < 0.001. N=3 for male oim groups at 8 weeks, except  
217 for +/oim and bone density measurements where n=4. N=4 for female oim groups at 8 weeks, except  
218 for oim/oim where n=5. N=3 for male oim/oim at 18 weeks, except for bone density where n=4. N=4 for  
219 male oim/oim and female +/+, whilst n=5 for other oim groups at 18 weeks. N=6 for all Col1a2 null  
220 groups at 8 weeks and n=5 for all Col1a2 null groups at 18 weeks. N=4 for all Col1a2 null groups at 52  
221 weeks, except male +/+ where n=5 and +/- where n=6.

222  
223  
224 To determine whether biomechanical properties of bones differed between the Col1a2 null and oim  
225 lines, femurs and tibias from both male and female mice at various ages were subjected to three-point  
226 bending to measure ultimate force, stiffness, stress and elastic modulus (Figs. 4-5). Ultimate force and  
227 stiffness were reduced in both male and female oim homozygotes at 8 and 18 weeks in the femur (Fig.  
228 4 A, B, F, G) and the tibia (Fig. 5 A, B, F, G), although differences were not significant in 8 week tibia for  
229 which a non-parametric test was used. The cross-sectional area was also reduced at 18 weeks in the  
230 femur (by 15% and 22% in males and females respectively) (Fig. 4J), and at 8 weeks (44% in males, 18%  
231 in females) and 18 weeks (31% in males, 25% in females) in the tibia (Fig. 5 E, J), consistent with  
232 alterations to extrinsic biomechanical properties in oim homozygotes. Ultimate force reductions in the  
233 femur were 47% and 65% at 8 and 18 weeks respectively in males, and 51% at both ages in females (Fig.  
234 4 A, F). In the tibia ultimate force was reduced by 54% in males and 44% in females at 18 weeks (Fig.  
235 5F). Stiffness was reduced by 42% and 46% at 8 and 18 weeks in males and by 21% and 42% in females  
236 in the femur (Fig. 4B, G), and by 44% and 34% in males and females respectively in the tibia at 18 weeks  
237 (Fig. 5G). Only the 8 week femur showed a significantly lower ultimate force for oim heterozygotes  
238 (27% for males and 39% for females) (Fig. 4A) whilst stiffness was reduced only in female oim  
239 heterozygotes in the tibia at 18 weeks (by 27%) (Fig. 5G). The intrinsic biomechanical property, ultimate  
240 stress, was reduced in oim homozygotes in the femur at both 8 (51% in males, 43% in females) and 18  
241 weeks (65% in males, 27% in females) (Fig. 4 C, H), but not in the tibia (Fig 5 C, H). Elastic modulus was  
242 unchanged in oim homozygotes in either the femur or tibia (Figs 4&5 D, I).

243 Deletion of Col1a2 had no effect on 3-point bending parameters in the femur (Fig. 4). In the  
244 tibia only ultimate force was reduced (by 35%) in males at 18 weeks of age as compared to the wild-  
245 type controls (Fig. 5F), whilst ultimate stress was reduced by 39% as compared to Col1a2 null  
246 heterozygotes (Fig. 5H). At 52 weeks only the elastic modulus was affected in males, being reduced by  
247 26% in Col1a2 null homozygotes and 17% in heterozygotes.

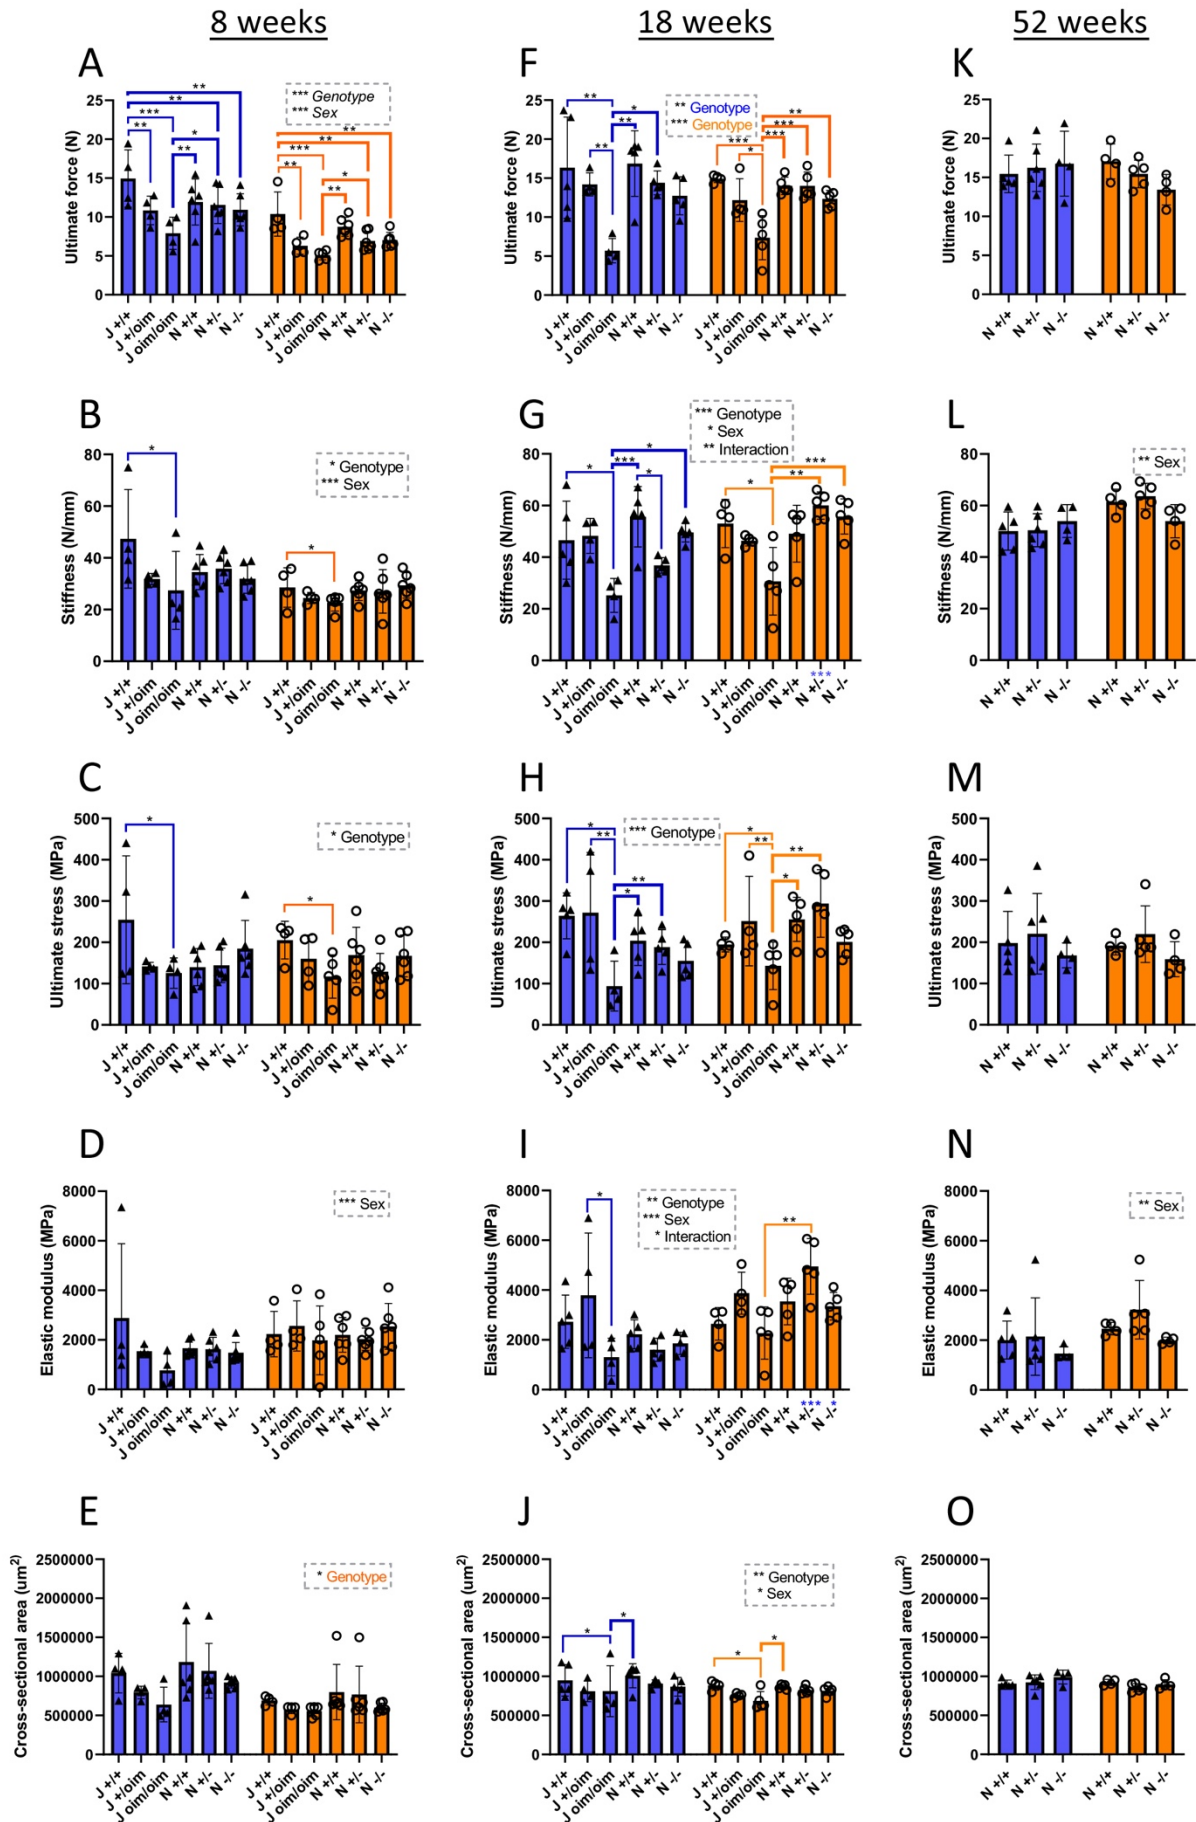

250 **Figure 4. Three-point bending of femurs from oim and Col1a2 null mice.** Femurs from oim and Col1a2  
251 null mice were subjected to three-point bending at 8 (A-E), 18 (F-J) and 52 weeks (K-O). Ultimate force  
252 (A, F, K) and stiffness (B, G, L) (extrinsic) measurements were normalised to cross-sectional area (E, J, O)  
253 to calculate ultimate stress (C, H, M) and elastic modulus (D, I, N) (intrinsic). Blue bars/triangles = males,  
254 orange bars/circles = females. Thin blue (male) and orange (female) brackets show differences between  
255 genotypes within mouse lines and thick brackets between lines. Male/female differences for particular  
256 genotypes are shown below the x-axis for females (blue stars). \* p-value < 0.05, \*\* p-value <0.01 and  
257 \*\*\* p-value <0.001. n=4 for all oim groups, except female J oim/oim and male 18 week J+/+ where n=5.  
258 n=6 for all Col1a2 null groups at 8 weeks and n=5 for all Col1a2 null groups at 18 weeks. n=4 for all  
259 Col1a2 null groups at 52 weeks, except female +/- and male +/- where n=5 and male +/- where n=6.  
260  
261

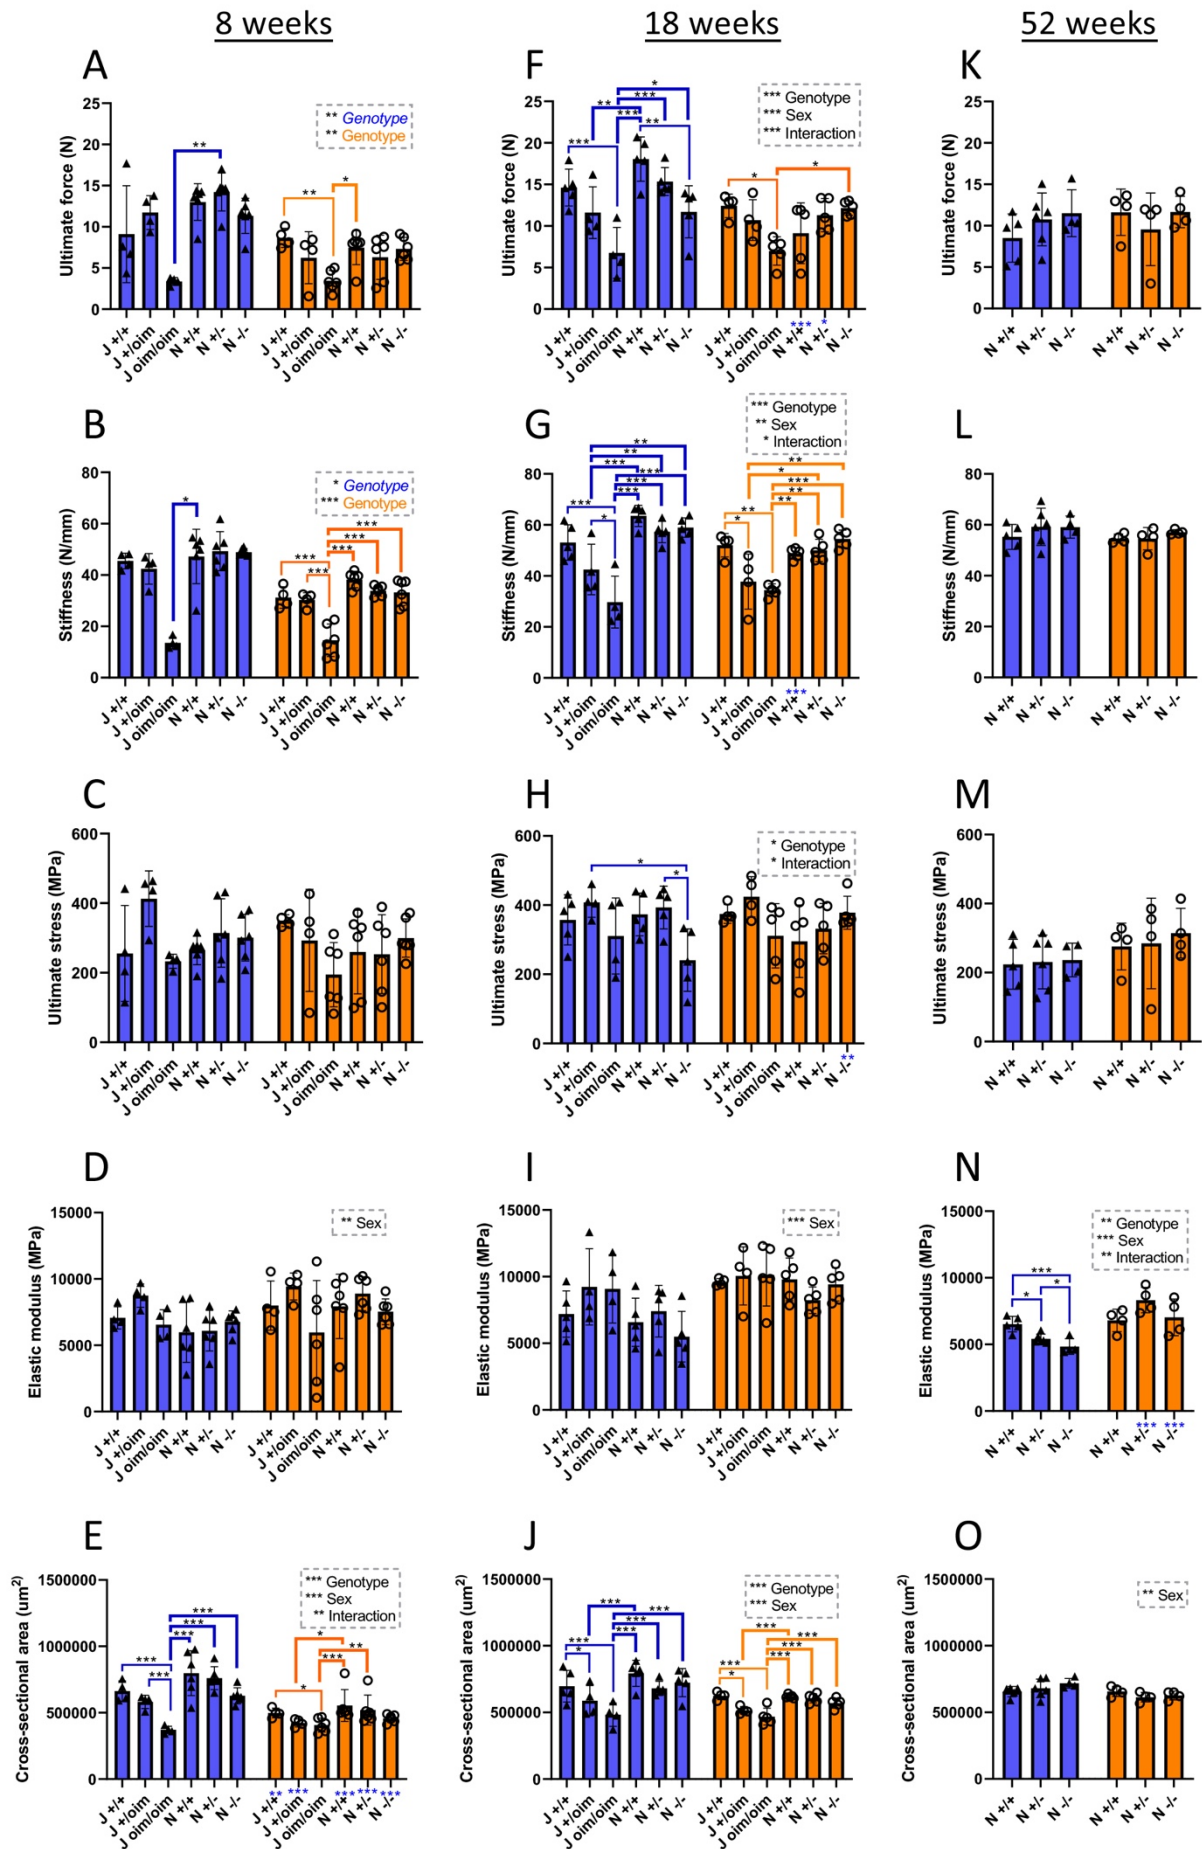

263  
264  
265  
266  
267  
268  
269  
270  
271  
272  
273  
274  
275  
276  
277

**Figure 5. Three-point bending of tibias from oim and Col1a2 null mice.** Tibias from oim and Col1a2 null mice were subjected to three-point bending at 8 (A-E), 18 (F-J) and 52 weeks (K-O). Ultimate force (A, F, K) and stiffness (B, G, L) (extrinsic) measurements were normalised to cross-sectional area (E, J, O) to calculate ultimate stress (C, H, M) and elastic modulus (D, I, N) (intrinsic). Blue bars/triangles = males, orange bars/circles = females. Thin blue (male) and orange (female) brackets show differences between genotypes within mouse lines and thick brackets between lines. Male/female differences for particular genotypes are shown below the x-axis for females (blue stars). \* p-value < 0.05, \*\* p-value < 0.01 and \*\*\* p-value < 0.001. n=4 for all oim groups, except female 18 week oim/oim and male 18 week J +/- where n=5, and female 8 week oim/oim where n=6. n=6 for all Col1a2 null groups at 8 weeks and n=5 for all Col1a2 null groups at 18 weeks. n=4 for all Col1a2 null groups at 52 weeks, except male +/- where n=5 and male +/- where n=6.

### 278 **Analysis of trabecular bone of oim and Col1a2 null mice**

279 To analyse differences in trabecular bone structure between genotypes, the proximal tibias from oim  
280 and Col1a2 null mice were analysed by  $\mu$ CT (Fig. 6).

281 There were significant changes in bone volume and architecture in both males and females  
282 carrying the oim mutation at both 8 weeks and 18 weeks of age, and most of the differences showed an  
283 apparent gene dose effect. In males at 8 weeks, BV/TV was decreased by 42% in heterozygote mice and  
284 80% in homozygous mice compared to wild-type controls (Fig. 6A), due to a decrease in both trabecular  
285 thickness (Fig. 6B) and trabecular number (Fig. 6D). The decrease in trabecular thickness and number  
286 led to a 151% increase of trabecular separation in oim/oim homozygotes (Fig. 6C). Similar changes were  
287 observed in female mice at 8 weeks and whilst still pronounced the differences tended to be smaller,  
288 and trabecular thickness was unaffected (Fig. 6B). Differences observed for heterozygotes of both sexes  
289 were less than those of the respective homozygotes.

290 At 18 weeks of age, the pattern of the effects of the oim mutation on trabecular bone were  
291 similar to those observed at 8 weeks, however the differences between wild-types, heterozygotes and  
292 homozygotes were generally smaller. For instance, BV/TV in males was decreased by 50% at 18 weeks  
293 (Fig. 6F), compared to 80% at 8 weeks of age (Fig. 6A). There was no longer a significant reduction in  
294 trabecular thickness in males, and even an increase in female homozygotes (Fig. 6G).

295 The only similar alterations resulting from Col1a2 deletion were an 11% decrease in trabecular  
296 thickness in 8 week old male null homozygotes and a 10% decrease in heterozygotes (Fig. 6B).  
297 Conversely at 52 weeks in males there were Col1a2 loss-dependent increases in BV/TV and trabecular  
298 number, with increased connectivity in homozygotes but not heterozygotes. No differences were  
299 detected between wild-types of each strain, indicating that this had no influence on the bone structural  
300 parameters measured.

301

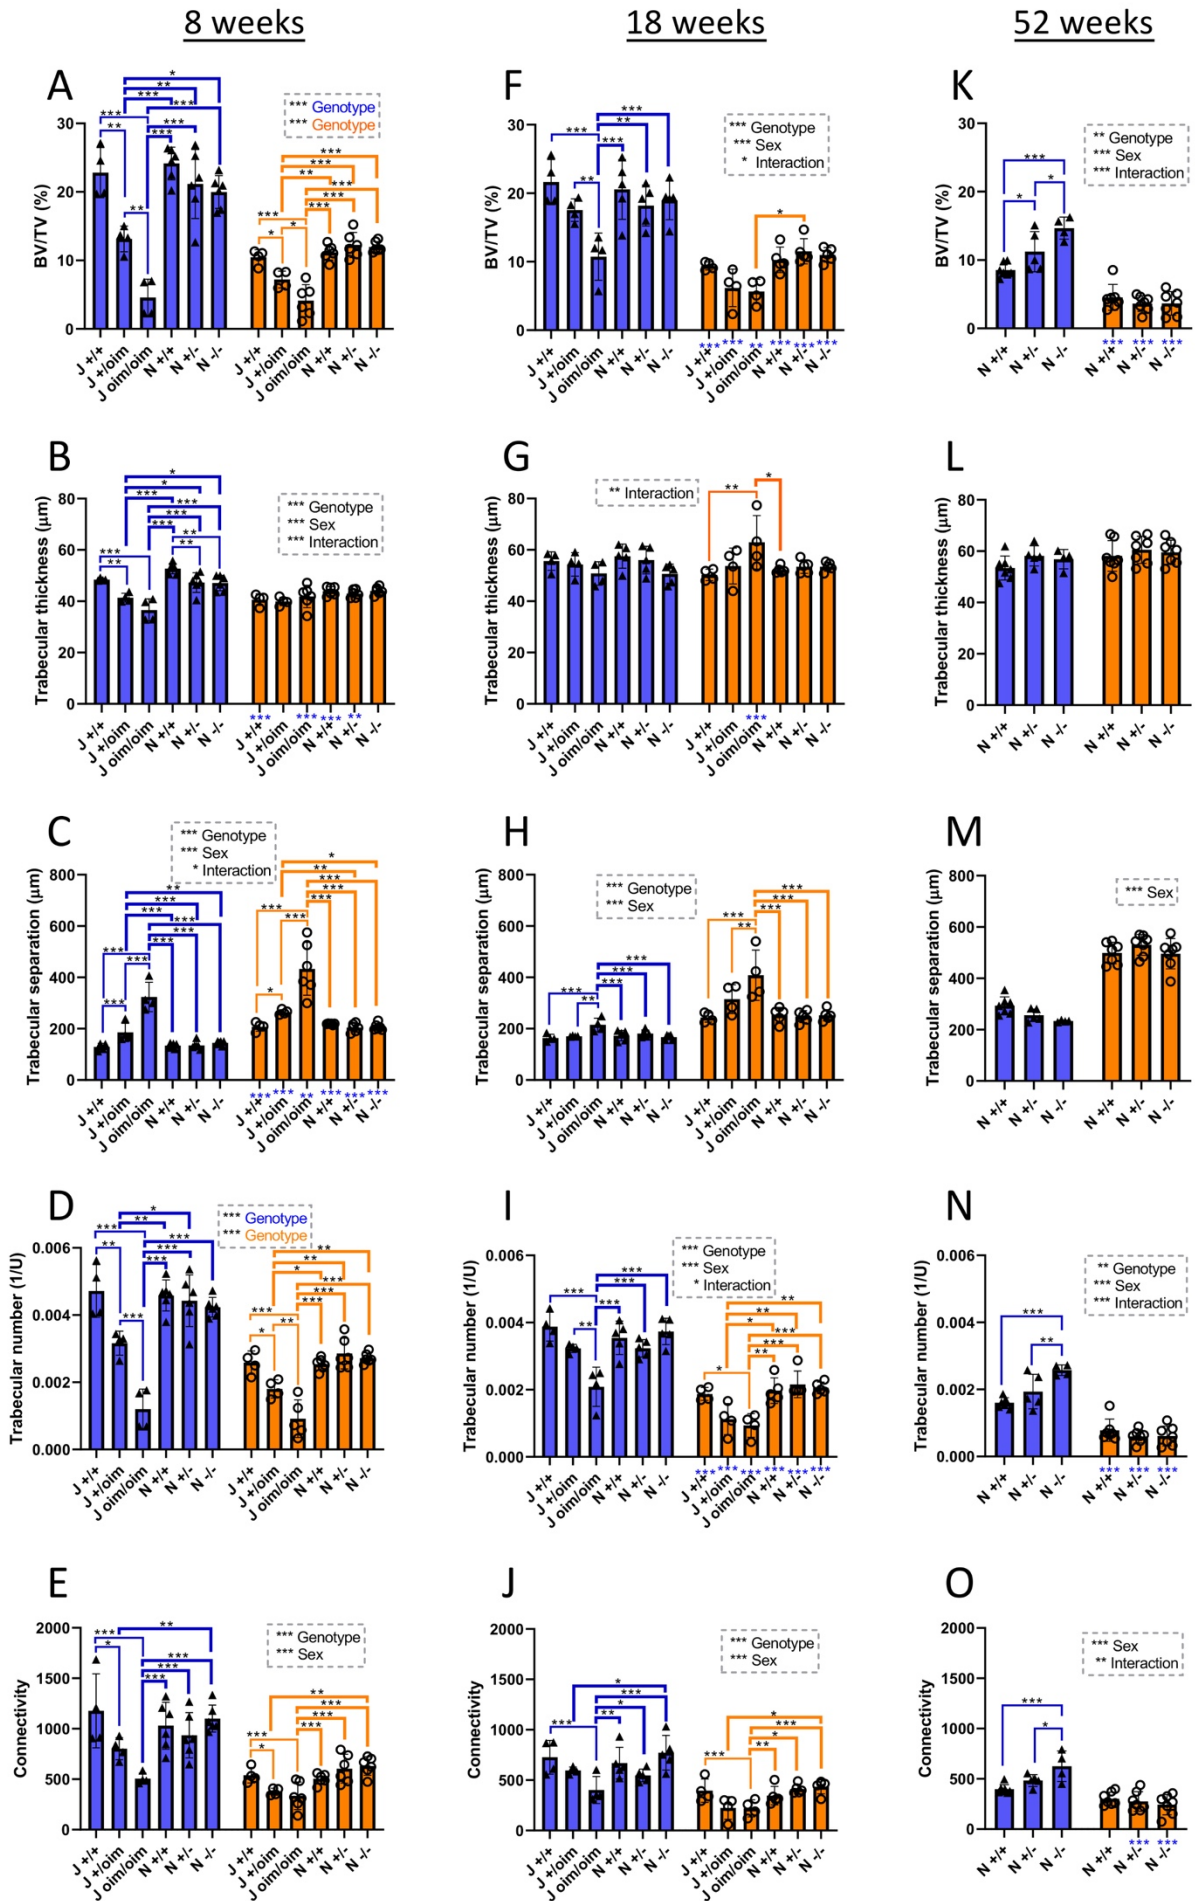

303 **Figure 6. Micro-computed tomography bone scans of oim and Col1a2 null mice.** MicroCT scans were  
304 performed on the knee joints of oim and Col1a2 null mice at 8 (A-E), 18 (F-J) and 52 weeks (K-O).  
305 Reconstruction and analysis of scan files enabled determination of bone volume (BV/TV) (A, F, K),  
306 trabecular thickness (B, G, L), trabecular separation (C, H, M), trabecular number (D, I, N) and  
307 connectivity (E, J, O). Blue bars/triangles = males, orange bars/circles = females. Thin blue (male) and  
308 orange (female) brackets show differences between genotypes within mouse lines and thick brackets  
309 between lines. Male/female differences for particular genotypes are shown below the x-axis for  
310 females (blue stars). \* p-value < 0.05, \*\* p-value < 0.01 and \*\*\* p-value < 0.001. n=4 for all oim groups,  
311 except female 8 week old oim/oim where n=6 but n=5 in D. n=6 for all Col1a2 null groups at 8 weeks  
312 and n=5 for all Col1a2 null groups at 18 weeks. n=7 for all Col1a2 null groups at 52 weeks, except male  
313 +/- where n=5 and male -/- where n=4.

314  
315

### 316 Age-related deterioration of Col1a2 null male homozygotes

317 The tm1b line (Col1a2 null) was maintained on a mild protocol and mice exceeding the mild severity  
318 limit were legally required to be humanely killed. We noted an unexpectedly high loss of male Col1a2  
319 null homozygotes due to a loss of condition, including weight loss and respiratory difficulties. A Kaplan-  
320 Meier 'survival' analysis was performed on the Col1a2 null mouse line (Fig. 7). All genotyped mice from  
321 this line were included in the analysis up to the age of 12 months, the end point for all experiments. The  
322 majority of genotypes had very few losses throughout the time course, with no animals lost for female  
323 wild-types and heterozygotes and only one animal lost for female homozygotes, male wild-types and  
324 heterozygotes out of a total of 19 mice. In contrast, almost 50% of male homozygotes were lost over  
325 the 12 month experimental period.

326  
327

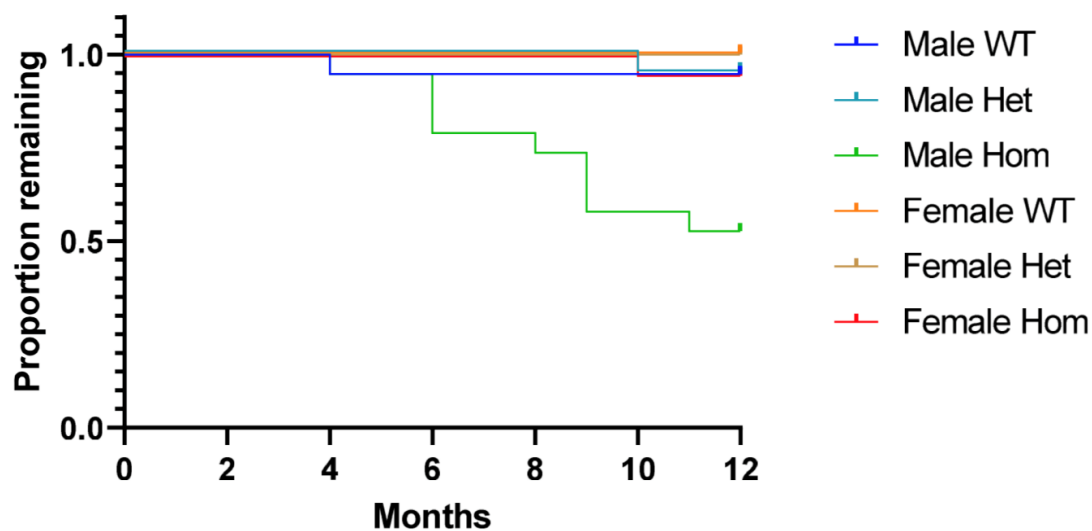

328  
329

330 **Figure 7. Survival analysis for the Col1a2KO mouse line.** A Kaplan-Meier 'survival' analysis was  
331 performed on all genotyped mice from the Col1a2 null line up until 12 months (end of experiment). A  
332 log-rank (Mantel-Cox) test was performed which gave an overall p-value of < 0.0001 indicating a  
333 significant difference between survival curves. n=19 for all groups.

334  
335

336 **Oim heterozygotes do not down-regulate the mutant allele**

337 We considered that the less severe bone phenotype of oim heterozygotes could be related to a  
338 compensatory down-regulation of mRNA from the oim mutant allele. A custom allelic discrimination  
339 assay indicated that mRNA from both alleles was present in bone tissue from heterozygotes at both 8  
340 (Fig. 8A) and 18 weeks of age (Fig. 8B). Whilst other tissues can be affected in the oim line the bone  
341 phenotype is particularly severe. We therefore determined whether there was compensatory  
342 downregulation of the mutant allele in tendon at 8 weeks (Fig. 8C) and 18 weeks (Fig. 8D), and in aorta  
343 (Fig. 8E), kidney (Fig. 8F), liver (Fig. 8G), or lung (Fig. 8H) at 18 weeks. For all tissues examined, mRNA  
344 from both alleles was present at a close to 50-50% ratio in heterozygotes.

345  
346  
347  
348  
349  
350  
351  
352  
353  
354  
355  
356  
357  
358  
359  
360  
361  
362  
363  
364  
365  
366  
367  
368

369 *Over page:*

370

371 **Figure 8. Allelic discrimination in the oim line.** Allelic discrimination was carried out in bone (A-B) and  
372 tendon (C-D) at 8 (A, C) and 18 weeks (B, D) and in aorta (E), kidney (F), liver (G) and lung (H) at 18  
373 weeks using ROX labelled primer/probes for the wild-type and VIC for the oim allele channels. For all  
374 tissues wild-types displayed little to no VIC signal, whilst homozygotes displayed no ROX signal.  
375 Heterozygotes had approximately intermediate signals in both channels with no systematic deviations  
376 between sexes or tissues. n=4 for all groups except 8 week bone and tendon samples from male and  
377 female oim/oim where n=2-3, 18 week bone and tendon samples from male +/- where n=5 and female  
378 +/-oim where n=1, kidney, aorta and lung samples for female +/- and +/-oim where n=3.



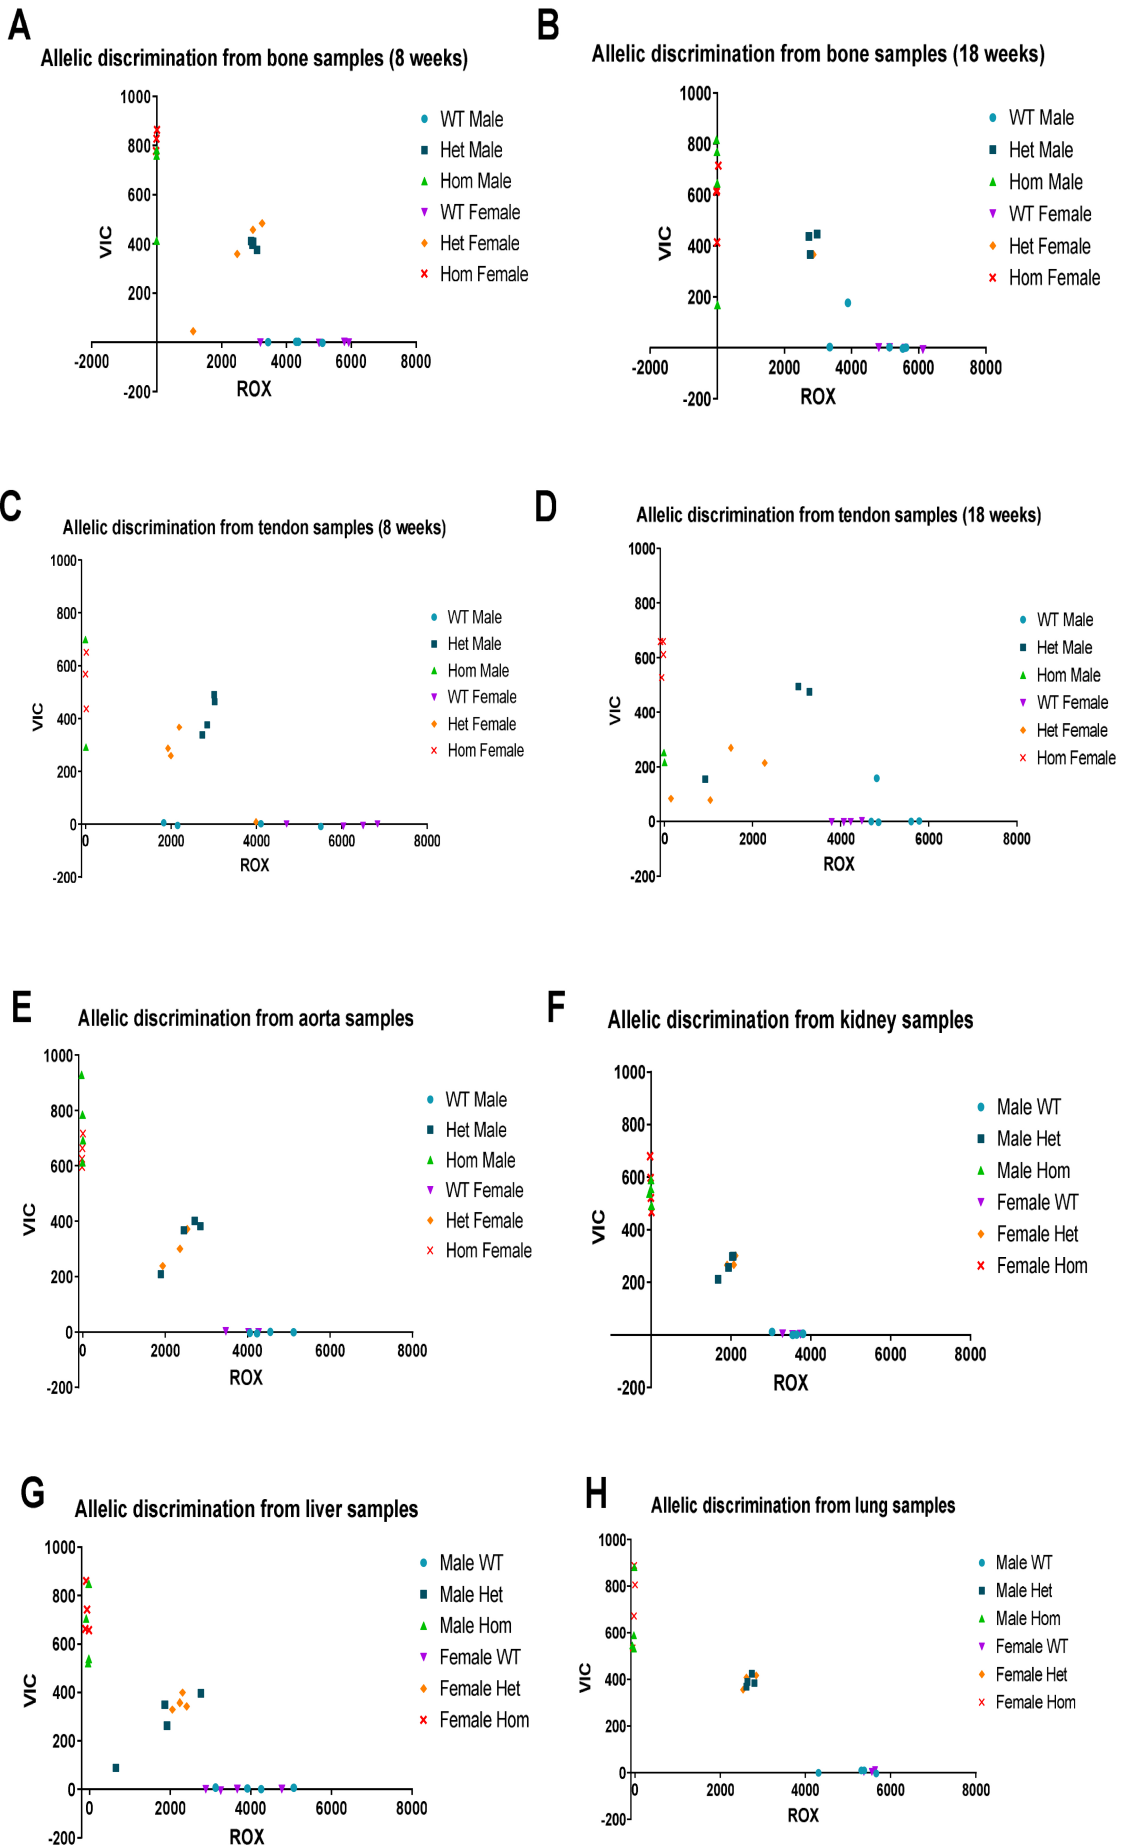

379  
380  
381

There is a genetic interaction between the *oim* mutant allele and collagen (I) homotrimer

382 As the mutant allele is not downregulated in oim heterozygotes, it is feasible that the less severe  
383 phenotype relates to gene dosage; given that heterozygotes have 1 rather than 2 copies of the mutant  
384 allele. To test this hypothesis we crossed the oim and tm1b lines to produce compound heterozygote  
385 offspring, along with heterozygotes of each genotype and wild-type controls (Fig. 9A). Compound  
386 heterozygotes contain only one copy of the oim mutant allele but have no wild-type Col1a2 allele so  
387 produce solely homotrimeric  $\alpha 1$  type I collagen.

388 The proximal tibias from 8-week-old oim and Col1a2 null (oim/Col1a2 null) cross line mice were  
389 analysed by  $\mu$ CT (Fig. 9 B-F). Oim/Col1a2 null compound heterozygotes demonstrated a significantly  
390 reduced bone volume (by 49% in males and 21% in females) (Fig. 9B), increased trabecular separation  
391 (by 60% in males, 35% in females) (Fig. 9D) and reduced trabecular number (by 40% in males and 24%  
392 in females) (Fig. 9E) compared to oim heterozygotes. No significant differences in trabecular thickness  
393 (Fig. 9C) and connectivity (Fig. 9F) were detected between compound heterozygotes (-/oim) and oim  
394 heterozygotes (+/oim) though differences between Col1a2 null heterozygotes (+/-) and compound  
395 heterozygotes were present for connectivity and trabecular thickness, and also between compound  
396 heterozygotes and wild-types (+/+) for trabecular thickness. Representative scan images (Fig. 9 G-M)  
397 support a structural deterioration with the oim allele as (+/oim) > (-/oim) > (oim/oim), indicating that  
398 gene dosage alone does not determine phenotypic severity.

399 The cortical bone of the femur was also analysed as an indicator of biomechanical properties.  
400 Cortical thickness was reduced by 28% in males and 13% in female compound heterozygotes as  
401 compared to oim heterozygotes (Fig. S1A). Differences were not detected for other cortical bone  
402 parameters (Fig. S1 B-E). Notably in the main 8 week cohort (Fig. 3) differences in cortical bone  
403 parameters were only detected between oim heterozygotes and homozygotes for polar moment of  
404 inertia in males and for tissue mineral density.

405 The data for the compound heterozygotes was compared to that of the oim homozygotes and  
406 the Col1a2 null line, all of which produce no heterotrimeric type I collagen (Fig. S2). Oim homozygotes  
407 and compound heterozygotes demonstrated a reduced bone volume (Fig. S2A) and trabecular thickness  
408 (males only) (Fig. S2B), increased trabecular separation (Fig. S2C), and reduced trabecular number (Fig.  
409 S2D) and connectivity (Fig. S1E) as compared to Col1a2 null homozygotes. For trabecular parameters,  
410 excepting trabecular thickness (Fig. S2B), the bone structural properties of oim homozygotes were  
411 inferior to that of compound homozygotes, which were themselves inferior to that of Col1a2 null  
412 homozygotes. For example bone volume (Fig. S2A) was reduced by 54% in male and 42% in female  
413 compound heterozygotes, but by 77% in male and 67% in female oim homozygotes as compared to  
414 Col1a2 null homozygotes. For cortical parameters, cortical thickness was lower in compound  
415 heterozygotes than in oim homozygotes or Col1a2 null homozygotes (Fig. S2F), whilst polar moment of  
416 inertia (Fig. S2G), periosteal circumference (males only) (Fig. S2H) and endosteal circumference (Fig.  
417 S2I) were lower in oim homozygotes and compound heterozygotes than in Col1a2 null homozygotes.  
418 Endosteal circumference mirrored the effect on most trabecular parameters with oim homozygotes  
419 having inferior bone structural properties than compound heterozygotes, whilst for polar moment of  
420 inertia and periosteal circumference (as with trabecular thickness in males) the oim heterozygotes and  
421 compound heterozygotes were comparable. Cortical thickness was unusual in that compound  
422 heterozygotes had inferior properties to oim homozygotes. Therefore the bone phenotype of the  
423 compound heterozygotes was considerably more severe than the Col1a2 null lacking any mutant  $\alpha 2(I)$   
424 chain, but generally less severe than or similar to the oim homozygotes with two mutant alleles.

425  
426

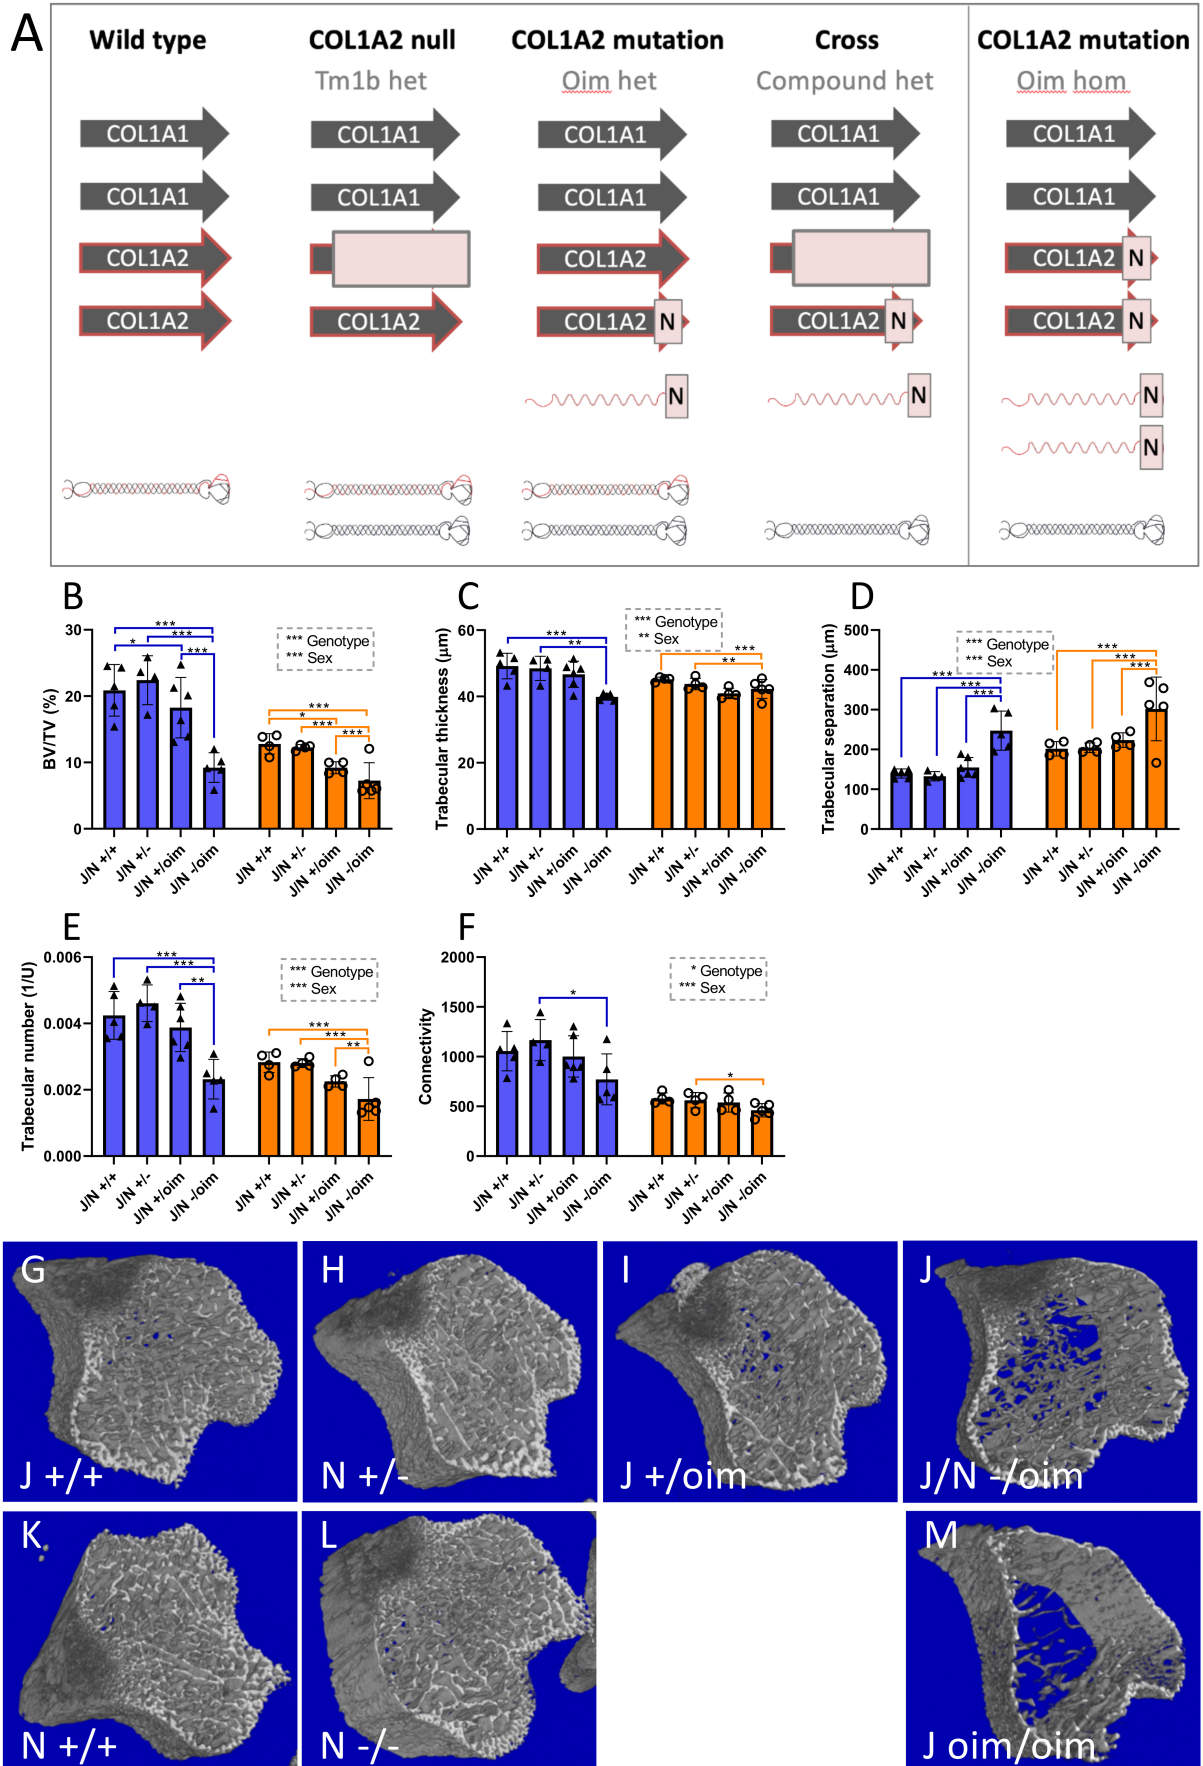

427  
428

429 **Figure 9. Bone structural properties are impaired in compound heterozygotes as compared to**  
430 **heterozygotes of the oim or Col1a2 null lines.** A: Genetic differences between the heterozygous oim  
431 and Col1a2 null alleles and the compound heterozygous allele, with implications for collagen (I) protein  
432 synthesis. The homozygous oim allele is shown for comparison. Arrows indicate COL1 genes; N indicates  
433 mutation, light red box indicates null allele. Folded heterotrimeric proteins are indicated in black and  
434 red, whilst homotrimers are in black only. The presence of unincorporated mutant Col1a2 allele is  
435 indicated as a red waveform with a mutation (N). B-F: MicroCT scans were performed on the knee joints  
436 of offspring from heterozygous crosses of each line. Reconstruction and analysis of scan files enabled  
437 determination of bone volume (B), trabecular thickness (C), trabecular separation (D), trabecular  
438 number (E) and connectivity (F). Blue bars/triangles = males, orange bars/circles = females. Blue and  
439 orange brackets show differences between genotypes within males (blue) or females (orange). \* p-  
440 value < 0.05, \*\* p-value < 0.01 and \*\*\* p-value < 0.001. n=4 for all groups, except male J/N +/- and J/N -  
441 /oim of both sexes where n=5, and male J/N +/-oim where n=6. G-M: Representative scan images from  
442 wild-types from the oim line (G), Col1a2 null heterozygotes (H), oim heterozygotes (I), compound  
443 heterozygotes (J), wild-types from the Col1a2 null line (K), Col1a2 null homozygotes (L) and oim  
444 homozygotes (M). Bone structural defects are more pronounced in compound than in oim  
445 heterozygotes.

446  
447

## 448 Discussion

449

450 The  $\alpha 2$  chain of type I collagen appears largely indispensable to vertebrate life, with heterotrimeric  
451  $((\alpha 1)_2(\alpha 2)_1)$  type I collagen predominating in tetrapods. Actinopterygians (ray-finned fish) even contain  
452 a third alpha chain ( $\alpha 3$ ) (42) and there is no obvious homotrimeric ( $\alpha 1_3$ ) type I collagen precursor in  
453 more distantly related organisms (4, 43). Human and mouse  $\alpha 2(I)$  chain mutations resulting in  
454 homotrimeric type 1 collagen were known to cause brittle bones (18, 25), whilst humans with COL1A2  
455 null alleles have cardiac valvular EDS but no overt bone phenotype (32). However common COL1A1  
456 alleles resulting in homotrimeric type I collagen are associated with osteoporosis (5). Here we have  
457 shown that homotrimeric collagen *per se* largely does not affect bone structural and mechanical  
458 properties, but there is pre-weaning loss of male heterozygotes and age-related loss of male null  
459 homozygotes as well as a detrimental genetic interaction between the oim mutant Col1a2 allele and  
460 the homotrimeric form.

461 To determine the contribution of collagen (I) homotrimer to bone fragility, we compared the  
462 bone phenotype of two mouse lines that lack the  $\alpha 2$  chain of type I collagen: the oim mutant, a Col1a2  
463 null and a combination of the lines. After propagating the lines, we measured a difference in Mendelian  
464 inheritance for males from both lines; interestingly this seemed to increase the proportion of wild-type  
465 males whilst decreasing the proportion of heterozygotes. To our knowledge pre-weaning loss of male  
466 heterozygotes has not been reported for either line. Enzymatic susceptibility assays and differential  
467 scanning calorimetry have previously indicated that tail tendon from heterozygous oim mice contains  
468 both heterotrimeric and homotrimeric type I collagen (44, 45). Reconstituted fibrils comprising both  
469 heterotrimeric and homotrimeric collagen (I) molecules showed subfibrillar segregation of each trimeric  
470 form (46). Hence, mixed fibrils in heterozygotes may affect tissue remodelling or mechanics during  
471 development resulting in decreased survival of heterozygotes.

472 Unlike oim homozygotes, we observed no fractures in Col1a2 null homozygotes. Bone  
473 structural parameters and material properties were largely similar between wild-type, heterozygote  
474 and Col1a2 null homozygotes. However, there was a reduction in femoral cortical thickness at 18

475 weeks, and for males a reduction in ultimate force in the tibia at 18 weeks and trabecular thickness at 8  
476 weeks; paralleling the trend but not the extent of the reduction observed in oim homozygotes. Our  
477 results for the oim line at 8 weeks are in agreement with previous studies showing a significant  
478 reduction in tibial bone volume and trabecular thickness in oim homozygotes (47) and a significant  
479 reduction in ultimate force, stiffness and ultimate stress of the femur (48). By including sex as a factor  
480 in our analyses we noted the decrease in tibial trabecular thickness was particular to male  
481 homozygotes. Our results for the oim line at 18 weeks were similar to those previously reported for 4  
482 month old mice on the same background although with some differences relating to the significance or  
483 gender/sex dependence of the differences (29). In accordance with previous studies, we found no  
484 difference in intrinsic elastic modulus or ultimate stress of the tibia of oim homozygotes compared to  
485 wild-type controls (29, 48, 49), although ultimate stress but not elastic modulus was decreased in the  
486 femur. Decreased femoral ultimate stress was previously reported for 12-14 week oim homozygotes  
487 (50, 51), but not in all studies (52). Oim homozygote mice were lighter and visually smaller than their  
488 wild-type and heterozygote littermates, therefore the differences seen in extrinsic but not intrinsic  
489 mechanical properties, particularly of the tibia, between oim homozygotes and wild-types could imply  
490 that the increased bone fragility of oim homozygotes is due to the reduced size of these mice. Cross-  
491 sectional area was significantly reduced in the tibia at both ages, and in the femur at 18 weeks, though  
492 not at 8 weeks. microCT analysis however indicates some intrinsic differences in bone structure, with  
493 reduced cortical and trabecular bone.

494 Col1a2 null homozygotes did not display bone fragility but swollen joints were identified in  
495 males who also displayed age-related deterioration in condition. Human COL1A2 null homozygotes  
496 have cardiac valvular Ehlers-Danlos syndrome (cvEDS) (32, 33) hence the age-related deterioration in  
497 mice may relate to cardiovascular abnormalities. Indeed the International Mouse Phenotyping  
498 Consortium reports dilated left heart ventricle in males measured at 12 weeks of age and increased  
499 heart weight at 16 weeks in Col1a2 null homozygotes (53). Cardiovascular abnormalities were however  
500 observed in mice of both sexes and cvEDS patients are not solely male. It may be that cardiovascular  
501 defects present earlier in male mice due to increased activity or remain subclinical in females. IMPC  
502 also reported a skeletal phenotype for Col1a2 null male mice with increased (notably not decreased)  
503 bone mineral content and density (DEXA, 14 weeks) and “abnormal” femur and tibia morphology (X-  
504 ray, 14 weeks). Reported phenotypes change over time due to continual addition of control samples,  
505 but alterations to body fat in males and increased circulating alkaline phosphates in females were also  
506 listed. In the present study, loss of Col1a2 appeared to improve some bone structural parameters by 52  
507 weeks (periosteal and endosteal circumference in females, tissue mineral density, trabecular bone  
508 volume, trabecular number and connectivity in males), possibly reflecting lower turnover of  
509 homotrimeric collagen (I). Elastic modulus was however reduced in Col1a2 null males by 52 weeks  
510 indicative of some altered bone material properties. Overall a combination of early loss of heterozygous  
511 males and age-related deterioration in null homozygotes could exert selective pressure to maintain the  
512 heterotrimeric form of type I collagen in vertebrate populations.

513 Whilst the strain of the lines differs slightly (C57BL/6J versus C57BL/6N), similar cortical and  
514 trabecular bone parameters have been reported in both strains (54). In the present study, differences  
515 were detected between wild-types of each strain at 8 weeks for cortical thickness (Fig. 3A) and tissue  
516 mineral density (Fig. 3E) in both sexes, and for polar moment of inertia (Fig. 3B) and periosteal  
517 circumference (Fig. 3C) in males. However for cortical thickness and polar moment of inertia the oim  
518 homozygotes (J oim/oim) were still significantly lower than the Col1a2 wild-types (N +/+) as well as than  
519 wild-types of their background strain (J +/+). For 3-point bending parameters of either the femur or  
520 tibia there were no significant differences between wild-types of either strain. Hence solely periosteal

521 circumference and tissue mineral density differences may be influenced by the background strain.  
522 Reduced periosteal circumference in male compound heterozygotes (but not cortical thickness, polar  
523 moment of inertia or endosteal circumference) could therefore be influenced by the mixed 6J/6N  
524 background.

525 A key finding of this study was that the bone phenotype of a single copy of the oim allele was  
526 exacerbated by the absence of heterotrimeric type I collagen; i.e. that oim heterozygotes had a less  
527 severe phenotype than compound oim/null heterozygotes. Notably the phenotype of oim homozygotes  
528 still appeared more severe than that of compound heterozygotes, indicating some gene dosage effect  
529 for the mutant allele. Oim heterozygotes do not down-regulate the mutant allele (Fig. 7) hence  
530 presumably there is no mechanism to detect the oim mutation prior to translation or trimerization.  
531 Despite the severe bone phenotype in oim homozygotes, and whilst ER stress has been demonstrated  
532 in other OI models (37-41) we detected no evidence of increased ER stress by qPCR or by osteoblast  
533 ultrastructural analysis (not shown). A report indicating that relieving ER stress improves femoral  
534 mechanical properties in oim heterozygotes, actually demonstrated no difference between placebo and  
535 treatment groups and did not monitor ER stress (55). We did observe several significant differences  
536 between oim heterozygotes and wild-type controls, including all tibial structural parameters and  
537 femoral ultimate force at 8 weeks. At 18 weeks differences were limited to tibial stiffness in females  
538 and tibial cross-sectional area, consistent with a previous study which reported few significant  
539 differences between wild-types and heterozygotes at 18 weeks (Yao et al., 2013). Hence bone structural  
540 parameters can improve between 8 and 18 weeks in both heterozygotes and homozygotes. In oim  
541 heterozygotes at 8 weeks it is unclear if the observed differences in bone parameters relate solely to  
542 the interaction between the oim mutant allele and the proportion of homotrimeric collagen (I) that was  
543 present, or if the oim allele alone exerts an effect. The genetic interaction between the oim allele and  
544 homotrimeric collagen (I) could relate to the process of collagen folding and trimerization within the  
545 endoplasmic reticulum. The observed allelic series is consistent with a model in which the abnormal  
546 alpha-2 chain trimerises with two normal alpha-1 chains, but results in trimer degradation and  
547 concurrent suppression of collagen fibril assembly. Alternatively the homotrimeric collagen (I) could  
548 alter cell-matrix interactions to modulate cellular stress responses, if present. Procollagen N- and C-  
549 propeptides, derived from the proteolytic cleavage of procollagen, have been shown to have  
550 intracellular roles in modulating protein synthesis (56-58) whilst homotrimeric triple helical regions  
551 increased proliferation and migration as compared to heterotrimeric pepsinised collagen (11). Hence  
552 homotrimeric forms of collagen fibrils or propeptides have the potential for altered signalling affecting  
553 cellular stress responses. The association of homotrimeric type I collagen with several common human  
554 age-related diseases, in which it is unlikely to predominate structurally, could therefore relate to  
555 altered cellular signalling or cell stress responses.

556 The experiments outlined above demonstrate a genetic interaction between homotrimeric  
557 collagen (I) and the oim mutant allele, suggesting that the presence of heterotrimeric collagen (I) in oim  
558 heterozygotes alleviates the effect of the oim mutant allele in bone.

559

560

## 561 **Materials and Methods**

562

### 563 **Mouse models**

564 A Col1a2 knock-out mouse line (Col1a2<sup>tm1b(EUCOMM)Wtsi</sup>, C57BL/6N) (Col1a2 null, N) and osteogenesis  
565 imperfecta mouse line (Col1a2<sup>oim</sup>, C57BL/6J) (oim, J) were used to investigate the effects of the absence  
566 and the mis-folding of the  $\alpha 2(I)$  polypeptide chain respectively (Fig. 1B). The Col1a2<sup>tm1b(EUCOMM)Wtsi</sup> line

567 was derived from Col1a2<sup>tm1a(EUCOMM)Wtsi</sup>, purchased from the Mutant Mouse Resource and Research  
568 Centre (MMRRC) at UC Davies, by Cre-mediated recombination (59) during IVF provided by MRC  
569 Harwell. The Col1a2<sup>oim</sup> line was a kind gift from Prof. Charlotte Phillips, University of Missouri and was  
570 subsequently rederived using Charles River (Massachusetts, USA) services. The strains have been  
571 deposited and are available from the MMRRC (RRID 66964, C57BL/6N-  
572 Col1a2<sup><tm1b(EUCOMM)Wtsi>/LaelMmnc</sup> and RRID 66518, B6J.Cg-Col1a2<sup>oim</sup>/McbrMmnc). Mice were  
573 housed at the University of Liverpool in a specific pathogen free unit in groups of up to 5 by litter, with  
574 oim homozygotes and Col1a2 null/oim heterozygotes housed separately after weaning. Food and water  
575 were supplied *ad libitum* and wet food was supplied to oim homozygotes and Col1a2 null/oim  
576 heterozygotes due to fragile teeth. Cage balconies were removed for oim homozygotes and Col1a2  
577 null/oim heterozygotes to reduce fracture risk and non-tangling bedding was supplied as standard for  
578 all mice. The mice were housed in the same room at 20-24°C and 45-65% humidity with a 12 hour  
579 light/dark cycle. All breeding and maintenance of animals was performed under project licences  
580 PP4874760 and P92F55CB2, in compliance with the Animals (Scientific Procedures) Act 1986 and UK  
581 Home Office guidelines. Details of all animals were recorded on tick@lab (a-tune) laboratory animal  
582 management software (Darmstadt, Germany), including health and treatment reports. Genotyping was  
583 carried out using Transnetyx (Tennessee, USA) services using the 'Col1a2-2 WT' probe with 'LAC Z' or  
584 'L1L2-Bact-P TA' for tm1a allele or 'L1L2 tm1b' for tm1b allele, and the 'oim' probe for the oim line.  
585 Blinding was carried out by processing mice and labelling samples according to the mouse number,  
586 rather than genotype, however KJL was responsible for the initial allocation of animals to specific  
587 experimental groups. Wild-type (N +/+, J +/+), heterozygote (N +/-, J +/-) and homozygote (N -/-, J  
588 oim/oim) mice were sacrificed at 8 (±3 days) and 18 (±3 days) weeks for analysis as well as 52 weeks (±8  
589 days) for the Col1a2 null line. Eight and 18 weeks were chosen as the time points at which long bone  
590 growth and bone mineralisation respectively are complete. Oim mice were not maintained up to 52  
591 weeks due to welfare considerations for homozygotes exhibiting spontaneous fractures. Cross-breeding  
592 of both lines was also performed (Col1a2 null/oim, mixed background) and wild-type (+/+), Col1a2 null  
593 heterozygote (+/oim), oim heterozygote (+/-) and compound heterozygote (-/oim) mice were sacrificed  
594 at 8 weeks. A total of 281 mice were used in this study, excluding those from which solely 'survival' and  
595 health analyses were derived. No mice were excluded from experimental groups.

596

#### 597 **Mouse dissection**

598 Mice were culled using a rising carbon dioxide concentration method in an automated CO<sub>2</sub> delivery  
599 chamber. After confirmation of the permanent cessation of the circulation, the mice were weighed and  
600 the tail was removed at the base and added to PBS for further dissection. Next, the skin was removed,  
601 the femoral heads displaced from the acetabulum and the entire hind limbs detached and added to  
602 PBS. The skin was then removed from the tail and the tail tendons dissected free. Excess muscle was  
603 removed from the hind limbs and the feet removed at the tarsus. For techniques requiring isolated  
604 tendon and bone tissue, the patellar tendon was further removed, the femur and tibia separated, and  
605 all muscle dissected out.

606

#### 607 **Pulse-chase with <sup>14</sup>C-L-proline**

608 Tail tendon, patellar tendon and femur tissue was dissected from 8 week old Tm1b mice. Tissue was  
609 dissected into small pieces and added to DMEM containing penicillin/streptomycin (1% v/v), L-  
610 glutamine (2 mM), L-ascorbic acid 2-phosphate (200 μM), β-aminopropionitrile (400 μM) and 2.5 μCi/ml  
611 [<sup>14</sup>C]proline (GE Healthcare, Illinois, USA) and incubated at 37°C for 18 hours. The tissue samples were  
612 subsequently moved to media without [<sup>14</sup>C]proline for 3 hours. Collagen was then extracted from the

613 tissue samples using a salt extraction buffer (1 M NaCl, 25 mM EDTA, 50 mM Tris-HCl, pH 7.4)  
614 containing protease inhibitors (Roche, Basel, Switzerland). Samples were extracted overnight at 4°C  
615 with agitation. Extracts were analysed by electrophoresis on 6% Tris-Glycine gels (ThermoFisher,  
616 Massachusetts, USA) with delayed reduction (60). The gels were fixed (10% methanol, 10% acetic acid),  
617 dried under vacuum, and exposed to a phosphorimaging plate (BAS-IP MS). Phosphorimaging plates  
618 were processed using a phosphorimager (Typhoon FLA7000 IP) and densitometry carried out using  
619 ImageQuant software (GE Healthcare Life Sciences, Illinois, USA).

620

### 621 **Three point bending**

622 Before three-point bending tests, the freshly isolated intact femurs and tibiae (only those showing no  
623 evidence of fracture calluses) were imaged using  $\mu$ CT in order to obtain the cross-sectional area,  
624 circumference and moment of inertia measurements. Bones were scanned inside 1 ml syringes in PBS  
625 using a Skyscan 1272 scanner (Bruker, Kontich, Belgium). Scans were performed at a resolution of 9  $\mu$ m  
626 (60 kV, 150  $\mu$ A, 2x2 binning, rotation step size 0.5°, using a 0.5 mm aluminium filter). Scans were  
627 reconstructed using NRecon (Bruker, Kontich, Belgium) using Gaussian smoothing of 1, ring artefact  
628 reduction 5, and beam hardening compensation at 38%. For analysis of cortical bone parameters, a  
629 region of interest of 200 slices of the mid-femur and mid-tibia was selected and saved using Dataviewer  
630 (Bruker, Kontich, Belgium). Cross-sectional area for both bones, then cortical thickness, bone perimeter,  
631 periosteal circumference, second moment of area about the mediolateral axis and polar moment of  
632 inertia as well as bone density measurements for the femur, were obtained using custom macros in  
633 CTan (Bruker, Kontich, Belgium). Endosteal circumference was calculated using equation 1.1. Density  
634 measurements were calibrated using a set of hydroxyapatite phantoms (Bruker, Kontich, Belgium).

635

### 636 **Eq. 1.1**

637 
$$\text{Endosteal circumference} = \text{bone perimeter} - \text{periosteal circumference}$$

638

639 A Zwickline Fmax 1 kN (Zwick, Ulm, Germany) biomechanical tester fitted with a 50N load cell  
640 was used for three-point bending experiments. Femurs and tibiae were loaded at a span length of 8 mm  
641 and the crosshead was lowered at a rate of 0.5 mm/min using testXpert II software (Zwick). Ultimate  
642 force and stiffness measurements were calculated from the force-displacement curve, at the point of  
643 maximum load and the maximum gradient of the linear rising section of the graph respectively. The  
644 maximum stiffness and elastic modulus. were calculated as described (61)

645

### 646 **Micro computed tomography ( $\mu$ CT)**

647 Hind limbs were fixed overnight in 10% neutral buffered formalin before washing and storage in 70%  
648 ethanol. Limbs were loaded into 2 ml syringe tubes in 70% ethanol and scanned using a Skyscan 1272  
649 scanner (Bruker, Kontich, Belgium) at a resolution of 4.5  $\mu$ m (60 kV, 150  $\mu$ A, no binning, rotation step  
650 size 0.3°, using a 0.5 mm aluminium filter). Scans were reconstructed using NRecon software (Bruker) as  
651 described above. Trabecular bone parameters of the proximal tibia were measured in a volume,  
652 selected and saved using Dataviewer (Bruker), of 200 slices starting 20 slices distal to the growth plate  
653 as described (62). As previously, only bones that did not contain any fracture calluses were used.  
654 Trabecular bone parameters were measured using a custom macro in CTan (Bruker).

655

### 656 **Allelic discrimination**

657 RNA was extracted from tissues preserved in RNAlater by firstly applying Trizol to samples which were  
658 then homogenised using a steel ball lysing matrix and a FastPrep 24 tissue homogeniser (MP Biomedicals,



659 California, USA). RNA was extracted from homogenised samples using a Direct-Zol RNA kit (Zymo  
660 Research, California, USA) as per the manufacturer's instructions. The quantity and quality of RNA was  
661 assessed using a NanoDrop spectrophotometer (Thermo Fisher, Massachusetts, USA), 260/280 values  
662 between 1.8-2.1 were deemed of a sufficient RNA quality. cDNA was synthesised in a 25 µl reaction from  
663 0.5-1 µg of total RNA. The conditions for cDNA synthesis were: incubation at 5 minutes at 70°C, 60  
664 minutes at 37°C and 5 minutes at 93°C with 1 U/µl RNasin ribonuclease inhibitor, 2 mM PCR nucleotide  
665 mix, 8 U/µl M-MLV reverse transcriptase and 0.02 µg/µl random-hexamer oligonucleotides per reaction.

666 Detection of murine Col1a2 wild-type and mutant alleles was performed using a custom  
667 snpsig™ real-time PCR mutation detection/allelic discrimination kit (Primerdesign, Southampton, UK).  
668 10 ng of cDNA was added to 10 µl of PrecisionPLUS mastermix (Primerdesign, Southampton, UK), 1 µl of  
669 the custom genotyping primer/probe mix and 4 µl nuclease free water per reaction. Amplification was  
670 performed on a Stratagene qPCR machine with an initial enzyme activation step of 2 minutes at 95°C  
671 followed by 10 cycles of denaturation for 10 seconds at 95°C and extension for 60 seconds at 60°C.  
672 Finally, 35 cycles of denaturation for 10 seconds at 95°C and extension for 60 seconds at 68°C, with  
673 fluorogenic data collected during this extension step for the ROX (wild type) and VIC (oim) channels.

674

### 675 **Statistical analysis**

676 Sample size calculations were carried out using G\*Power 3.1.9.2 and Stata13 to give a power of at least  
677 90% at the 5% level of significance. Primary outcomes were defined as bone stiffness (N/mm), bone  
678 volume (%) and trabecular separation (µm) with a standardised effect size of 2 deemed to be  
679 biologically important. For comparison, effect sizes were calculated from previously reported oim data  
680 (48) as -2.0 (41%) for femur stiffness, -2.8 (48%) for bone volume and 2.8 (66%) for trabecular  
681 separation. Comparison of 'bone mineral density' (DEXA) effect sizes for the oim (63) and Col1a2 null  
682 lines (53) at 14 wks indicated effect sizes of a similar magnitude (d=-1.6 and 1.7 respectively). Group  
683 sizes of 3 were calculated for two-way ANOVA on normally distributed data to test the effect of  
684 genotype (Stata13). The sample size in each group was increased by 20% to allow for non-normality of  
685 the data to give planned group sizes of 4.

686 All statistical analysis was completed using SigmaPlot 14.0 or 14.5 software. Comparisons of  
687 continuous measurements across sex and genotype were carried out using a two-way ANOVA with a  
688 Holm-Sidak post-hoc test. Where residuals did not meet assumptions of normality (Shapiro-Wilk test) or  
689 equal variance (Brown-Forsythe test), data were transformed with a Box-Cox or Johnson transformation  
690 using Minitab 18 before analysis. If a suitable transformation was not identified, male and female  
691 datasets were analysed separately using a one-way ANOVA (denoted with coloured font on graphs). If  
692 residuals still did not meet assumptions a nonparametric Kruskal-Wallis one-way ANOVA on ranks with  
693 a Dunn's post-hoc test was used for comparisons (italicised on graphs). Comparisons of two categorical  
694 variables were done via a chi-squared test with the expected counts in each cell of the table being at  
695 least 5. The time to deterioration data were summarised via survival curves and statistically compared  
696 via a log-rank (Mantel-Cox) test, overall p-value is reported. No data points were excluded from  
697 statistical analysis. Data were plotted using GraphPad Prism 8.

698

699

### 700 **Author Contributions**

701 KJL: Data curation, Formal Analysis, Investigation, Project administration, Supervision, Visualization,  
702 Writing – original draft, Writing – review & editing; LR: Data curation, Investigation, Visualization; GBG:  
703 Funding acquisition, Methodology, Writing – review & editing; PC: Conceptualization, Funding  
704 acquisition, Writing – review & editing; RA: Funding acquisition, Methodology, Writing – review &

705 editing; GC: Formal Analysis, Funding acquisition, Writing – review & editing; RVH: Data curation,  
706 Investigation, Funding acquisition, Investigation, Methodology, Software, Supervision, Visualization,  
707 Writing – review & editing; EGC-L: Conceptualization, Formal Analysis, Funding acquisition, Project  
708 administration, Supervision, Visualization, Writing – original draft, Writing – review & editing.

709  
710

## 711 **Acknowledgements**

712

713 The study was funded by the UK Medical Research Council (MR/R00319X/1). LR was supported by the  
714 Erasmus+ program.

715

716

## 717 **References**

718

- 719 1. Canty EG, Kadler KE. Procollagen trafficking, processing and fibrillogenesis. *J Cell Sci.*  
720 2005;118(Pt 7):1341-53.
- 721 2. Lees JF, Tasab M, Bulleid NJ. Identification of the molecular recognition sequence which  
722 determines the type-specific assembly of procollagen. *EMBO J.* 1997;16(5):908-16.
- 723 3. Sharma U, Carrique L, Vadon-Le Goff S, Mariano N, Georges RN, Delolme F, et al. Structural  
724 basis of homo- and heterotrimerization of collagen I. *Nat Commun.* 2017;8:14671.
- 725 4. DiChiara AS, Li RC, Suen PH, Hosseini AS, Taylor RJ, Weickhardt AF, et al. A cysteine-based  
726 molecular code informs collagen C-propeptide assembly. *Nat Commun.* 2018;9(1):4206.
- 727 5. Ralston SH, Uitterlinden AG, Brandi ML, Balcells S, Langdahl BL, Lips P, et al. Large-scale  
728 evidence for the effect of the COL1A1 Sp1 polymorphism on osteoporosis outcomes: the GENOMOS  
729 study. *PLoS Med.* 2006;3(4):e90.
- 730 6. Philp AM, Collier RL, Grover LM, Davis ET, Jones SW. Resistin promotes the abnormal Type I  
731 collagen phenotype of subchondral bone in obese patients with end stage hip osteoarthritis. *Scientific*  
732 *reports.* 2017;7(1):4042.
- 733 7. Kerns JG, Gikas PD, Buckley K, Shepperd A, Birch HL, McCarthy I, et al. Evidence from Raman  
734 Spectroscopy of a Putative Link Between Inherent Bone Matrix Chemistry and Degenerative Joint  
735 Disease. *Arthritis & Rheumatology.* 2014;66(5):1237-46.
- 736 8. Bailey AJ, Sims TJ, Knott L. Phenotypic expression of osteoblast collagen in osteoarthritic bone:  
737 production of type I homotrimer. *Int J Biochem Cell Biol.* 2002;34(2):176-82.
- 738 9. Zhong B, Huang D, Ma K, Deng X, Shi D, Wu F, et al. Association of COL1A1 rs1800012  
739 polymorphism with musculoskeletal degenerative diseases: a meta-analysis. *Oncotarget.*  
740 2017;8(43):75488-99.
- 741 10. Brull DJ, Murray LJ, Boreham CA, Ralston SH, Montgomery HE, Gallagher AM, et al. Effect of a  
742 COL1A1 Sp1 binding site polymorphism on arterial pulse wave velocity: an index of compliance.  
743 *Hypertension.* 2001;38(3):444-8.
- 744 11. Makareeva E, Han S, Vera JC, Sackett DL, Holmbeck K, Phillips CL, et al. Carcinomas Contain a  
745 Matrix Metalloproteinase-Resistant Isoform of Type I Collagen Exerting Selective Support to Invasion.  
746 *Cancer Res.* 2010;70(11):4366-74.
- 747 12. Rojkind M, Giambone MA, Biempica L. Collagen Types in Normal and Cirrhotic Liver.  
748 *Gastroenterol.* 1979;76(4):710-9.
- 749 13. Ehrlich HP, Brown H, White BS. Evidence for type V and I trimer collagens in Dupuytren's  
750 Contracture palmar fascia. *Biochem Med.* 1982;28(3):273-84.
- 751 14. Han S, Makareeva E, Kuznetsova NV, DeRidder AM, Sutter MB, Losert W, et al. Molecular  
752 mechanism of type I collagen homotrimer resistance to mammalian collagenases. *J Biol Chem.*  
753 2010;285(29):22276-81.

- 754 15. Sims TJ, Miles CA, Bailey AJ, Camacho NP. Properties of collagen in OIM mouse tissues. *Connect*  
755 *Tissue Res.* 2003;44 Suppl 1:202-5.
- 756 16. Pfeiffer BJ, Franklin CL, Hsieh FH, Bank RA, Phillips CL. Alpha 2(I) collagen deficient oim mice  
757 have altered biomechanical integrity, collagen content, and collagen crosslinking of their thoracic aorta.  
758 *Matrix Biol.* 2005;24(7):451-8.
- 759 17. Carriero A, Zimmermann EA, Paluszny A, Tang SY, Bale H, Busse B, et al. How tough is brittle  
760 bone? Investigating osteogenesis imperfecta in mouse bone. *J Bone Miner Res.* 2014;29(6):1392-401.
- 761 18. Chipman SD, Sweet HO, McBride DJ, Jr., Davisson MT, Marks SC, Jr., Shuldiner AR, et al.  
762 Defective pro alpha 2(I) collagen synthesis in a recessive mutation in mice: a model of human  
763 osteogenesis imperfecta. *PNAS.* 1993;90(5):1701-5.
- 764 19. Carleton SM, McBride DJ, Carson WL, Huntington CE, Twenter KL, Rolwes KM, et al. Role of  
765 genetic background in determining phenotypic severity throughout postnatal development and at peak  
766 bone mass in Col1a2 deficient mice (oim). *Bone.* 2008;42(4):681-94.
- 767 20. Grabner B, Landis WJ, Roschger P, Rinnerthaler S, Peterlik H, Klaushofer K, et al. Age- and  
768 genotype-dependence of bone material properties in the osteogenesis imperfecta murine model (oim).  
769 *Bone.* 2001;29(5):453-7.
- 770 21. Vouyouka AG, Pfeiffer BJ, Liem TK, Taylor TA, Mudaliar J, Phillips CL. The role of type I collagen  
771 in aortic wall strength with a homotrimeric. *J Vasc Surg.* 2001;33(6):1263-70.
- 772 22. Misof K, Landis WJ, Klaushofer K, Fratzl P. Collagen from the osteogenesis imperfecta mouse  
773 model (oim) shows reduced resistance against tensile stress. *J Clin Invest.* 1997;100(1):40-5.
- 774 23. Phillips CL, Pfeiffer BJ, Luger AM, Franklin CL. Novel collagen glomerulopathy in a homotrimeric  
775 type I collagen mouse (oim). *Kidney Int.* 2002;62(2):383-91.
- 776 24. Nicholls AC, Pope FM, Schloon H. Biochemical heterogeneity of osteogenesis imperfecta: New  
777 variant. *Lancet.* 1979;1(8127):1193.
- 778 25. Nicholls AC, Osse G, Schloon HG, Lenard HG, Deak S, Myers JC, et al. The clinical features of  
779 homozygous alpha 2(I) collagen deficient osteogenesis imperfecta. *J Med Genet.* 1984;21(4):257-62.
- 780 26. Pace JM, Wiese M, Drenguis AS, Kuznetsova N, Leikin S, Schwarze U, et al. Defective C-  
781 propeptides of the proalpha2(I) chain of type I procollagen impede molecular assembly and result in  
782 osteogenesis imperfecta. *J Biol Chem.* 2008;283(23):16061-7.
- 783 27. Saban J, Zussman MA, Havey R, Patwardhan AG, Schneider GB, King D. Heterozygous oim mice  
784 exhibit a mild form of osteogenesis imperfecta. *Bone.* 1996;19(6):575-9.
- 785 28. Camacho NP, Hou L, Toledano TR, Ilg WA, Brayton CF, Raggio CL, et al. The material basis for  
786 reduced mechanical properties in oim mice bones. *J Bone Miner Res.* 1999;14(2):264-72.
- 787 29. Yao X, Carleton SM, Kettle AD, Melander J, Phillips CL, Wang Y. Gender-dependence of bone  
788 structure and properties in adult osteogenesis imperfecta murine model. *Ann Biomed Eng.*  
789 2013;41(6):1139-49.
- 790 30. Prockop DJ. Osteogenesis imperfecta. A model for genetic causes of osteoporosis and perhaps  
791 several other common diseases of connective tissue. *Arthritis Rheum.* 1988;31(1):1-8.
- 792 31. Mann V, Hobson EE, Li B, Stewart TL, Grant SFA, Robins SP, et al. A COL1A1 Sp1 binding site  
793 polymorphism predisposes to osteoporotic fracture by affecting bone density and quality. *J Clin Invest*  
794 2001;107(7):899-907.
- 795 32. Malfait F, Symoens S, Coucke P, Nunes L, De Almeida S, De Paepe A. Total absence of the  
796 alpha2(I) chain of collagen type I causes a rare form of Ehlers-Danlos syndrome with hypermobility and  
797 propensity to cardiac valvular problems. *J Med Genet.* 2006;43(7):e36.
- 798 33. Guarnieri V, Morlino S, Di Stolfo G, Mastroianno S, Mazza T, Castori M. Cardiac valvular Ehlers-  
799 Danlos syndrome is a well-defined condition due to recessive null variants in COL1A2. *Am J Med Genet*  
800 *A.* 2019;179(5):846-51.
- 801 34. Maruelli S, Besio R, Rousseau J, Garibaldi N, Amiaud J, Brulin B, et al. Osteoblasts mineralization  
802 and collagen matrix are conserved upon specific Col1a2 silencing. *Matrix Biol Plus.* 2020;6-7:100028.
- 803 35. Makareeva E, Aviles NA, Leikin S. Chaperoning osteogenesis: new protein-folding disease  
804 paradigms. *Trends Cell Biol.* 2011;21(3):168-76.
- 805 36. Forlino A, Cabral WA, Barnes AM, Marini JC. New perspectives on osteogenesis imperfecta. *Nat*  
806 *Rev Endocrinol.* 2011;7(9):540-57.

- 807 37. Chessler SD, Byers PH. BiP binds type I procollagen pro alpha chains with mutations in the  
808 carboxyl-terminal propeptide synthesized by cells from patients with osteogenesis imperfecta. *J Biol*  
809 *Chem.* 1993;268(24):18226-33.
- 810 38. Lisse TS, Thiele F, Fuchs H, Hans W, Przemeck GK, Abe K, et al. ER stress-mediated apoptosis in a  
811 new mouse model of osteogenesis imperfecta. *PLoS Genet.* 2008;4(2):e7.
- 812 39. Forlino A, Kuznetsova NV, Marini JC, Leikin S. Selective retention and degradation of molecules  
813 with a single mutant alpha1(I) chain in the Brl1 IV mouse model of OI. *Matrix Biol.* 2007;26(8):604-14.
- 814 40. Mirigian LS, Makareeva E, Mertz EL, Omari S, Roberts-Pilgrim AM, Oestreich AK, et al.  
815 Osteoblast Malfunction Caused by Cell Stress Response to Procollagen Misfolding in alpha2(I)-G610C  
816 Mouse Model of Osteogenesis Imperfecta. *J Bone Miner Res.* 2016;31(8):1608-16.
- 817 41. Gioia R, Tonelli F, Ceppi I, Biggiogera M, Leikin S, Fisher S, et al. The chaperone activity of 4PBA  
818 ameliorates the skeletal phenotype of Chihuahua, a zebrafish model for dominant osteogenesis  
819 imperfecta. *Hum Mol Genet.* 2017;26(15):2897-911.
- 820 42. Kimura S. Wide distribution of the skin type I collagen alpha 3 chain in bony fish. *Comp Biochem*  
821 *Physiol B.* 1992;102(2):255-60.
- 822 43. Exposito JY, Valcourt U, Cluzel C, Lethias C. The fibrillar collagen family. *International journal of*  
823 *molecular sciences.* 2010;11(2):407-26.
- 824 44. McBride DJ, Jr., Choe V, Shapiro JR, Brodsky B. Altered collagen structure in mouse tail tendon  
825 lacking the alpha 2(I) chain. *J Mol Biol.* 1997;270(2):275-84.
- 826 45. Kuznetsova NV, McBride DJ, Leikin S. Changes in thermal stability and microunfolded pattern of  
827 collagen helix resulting from the loss of alpha2(I) chain in osteogenesis imperfecta murine. *J Mol Biol.*  
828 2003;331(1):191-200.
- 829 46. Han S, McBride DJ, Losert W, Leikin S. Segregation of type I collagen homo- and heterotrimers  
830 in fibrils. *J Mol Biol.* 2008;383(1):122-32.
- 831 47. Ranzoni AM, Corcelli M, Hau KL, Kerns JG, Vanleene M, Shefelbine S, et al. Counteracting bone  
832 fragility with human amniotic mesenchymal stem cells. *Scientific reports.* 2016;6:39656.
- 833 48. Vanleene M, Saldanha Z, Cloyd KL, Jell G, Bou-Gharios G, Bassett JH, et al. Transplantation of  
834 human fetal blood stem cells in the osteogenesis imperfecta mouse leads to improvement in multiscale  
835 tissue properties. *Blood.* 2011;117(3):1053-60.
- 836 49. Vanleene M, Porter A, Guillot P-V, Boyde A, Oyen M, Shefelbine S. Ultra-structural defects  
837 cause low bone matrix stiffness despite high mineralization in osteogenesis imperfecta mice. *Bone.*  
838 2012;50(6):1317-23.
- 839 50. Bart ZR, Hammond MA, Wallace JM. Multi-scale analysis of bone chemistry, morphology and  
840 mechanics in the oim model of osteogenesis imperfecta. *Connect Tissue Res.* 2014;55 Suppl 1:4-8.
- 841 51. Miller E, Delos D, Baldini T, Wright TM, Pleshko Camacho N. Abnormal mineral-matrix  
842 interactions are a significant contributor to fragility in oim/oim bone. *Calcif Tissue Int.* 2007;81(3):206-  
843 14.
- 844 52. Zimmerman SM, Heard-Lipsmeyer ME, Dimori M, Thostenson JD, Mannen EM, O'Brien CA, et al.  
845 Loss of RANKL in osteocytes dramatically increases cancellous bone mass in the osteogenesis  
846 imperfecta mouse (oim). *Bone Rep.* 2018;9:61-73.
- 847 53. IMPC. International Mouse Phenotyping Consortium: Col1a2 [Available from:  
848 <https://www.mousephenotype.org/data/genes/MGI:88468>.
- 849 54. Simon MM, Greenaway S, White JK, Fuchs H, Gailus-Durner V, Wells S, et al. A comparative  
850 phenotypic and genomic analysis of C57BL/6J and C57BL/6N mouse strains. *Genome Biol.*  
851 2013;14(7):R82.
- 852 55. Takigawa S, Frondorf B, Liu S, Liu Y, Li B, Sudo A, et al. Salubrinal improves mechanical  
853 properties of the femur in osteogenesis imperfecta mice. *J Pharmacol Sci.* 2016;132(2):154-61.
- 854 56. Oganessian A, Au S, Horst JA, Holzhausen LC, Macy AJ, Pace JM, et al. The NH2-terminal  
855 propeptide of type I procollagen acts intracellularly to modulate cell function. *J Biol Chem.*  
856 2006;281(50):38507-18.
- 857 57. Hayata T, Nakamoto T, Ezura Y, Noda M. Ciz, a transcription factor with a nucleocytoplasmic  
858 shuttling activity, interacts with C-propeptides of type I collagen. *Biochem Biophys Res Commun.*  
859 2008;368(2):205-10.

- 860 58. Marongiu M, Deiana M, Marcia L, Sbardellati A, Asunis I, Meloni A, et al. Novel action of FOXL2  
 861 as mediator of Col1a2 gene autoregulation. *Dev Biol.* 2016;416(1):200-11.  
 862 59. Skarnes WC, Rosen B, West AP, Koutourakis M, Bushell W, Iyer V, et al. A conditional knockout  
 863 resource for the genome-wide study of mouse gene function. *Nature.* 2011;474(7351):337-42.  
 864 60. Sykes B, Puddle B, Francis M, Smith R. The estimation of two collagens from human dermis by  
 865 interrupted gel electrophoresis. *Biochem Biophys Res Commun.* 1976;72(4):1472-80.  
 866 61. Schriefer JL, Robling AG, Warden SJ, Fournier AJ, Mason JJ, Turner CH. A comparison of  
 867 mechanical properties derived from multiple skeletal sites in mice. *Journal of biomechanics.*  
 868 2005;38(3):467-75.  
 869 62. van 't Hof RJ, Dall'Ara E. Analysis of Bone Architecture in Rodents Using Micro-Computed  
 870 Tomography. *Methods Mol Biol.* 2019;1914:507-31.  
 871 63. Phillips CL, Bradley DA, Schlotzhauer CL, Bergfeld M, Libreros-Minotta C, Gawenis LR, et al. Oim  
 872 mice exhibit altered femur and incisor mineral composition and decreased bone mineral density. *Bone.*  
 873 2000;27(2):219-26.

874  
 875  
 876  
 877  
 878  
 879

## Supplementary Data

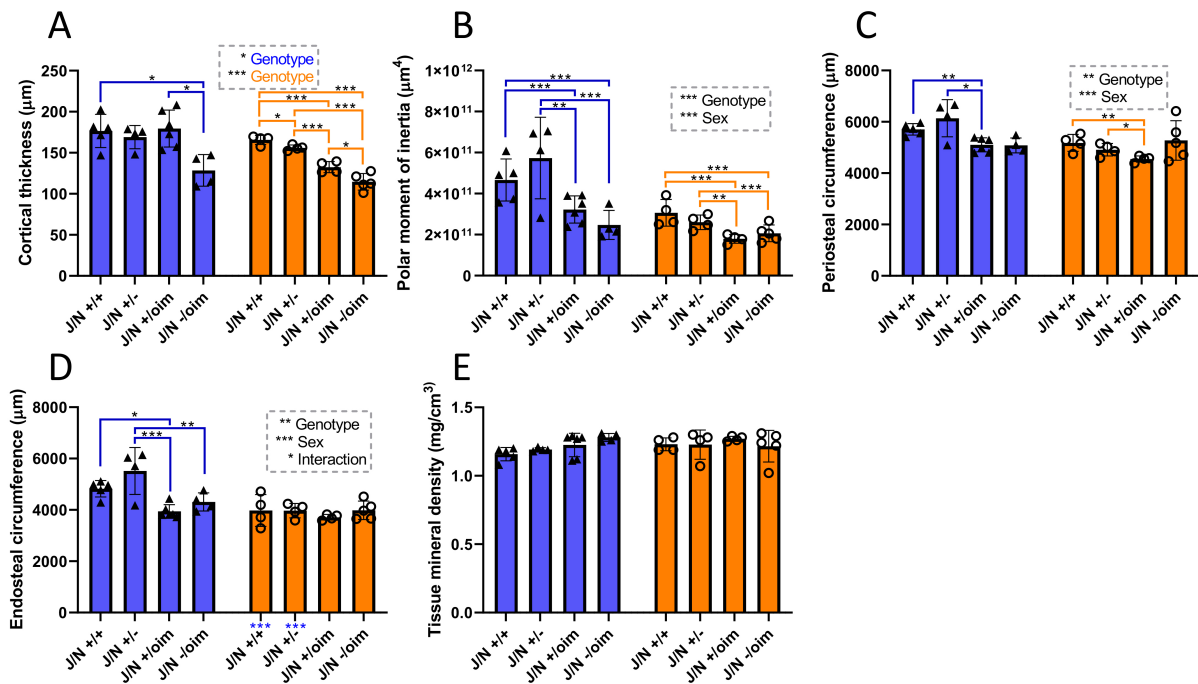

880  
 881  
 882  
 883  
 884  
 885  
 886  
 887  
 888  
 889  
 890

**Figure S1. Femoral cortical bone analyses in mixed heterozygotes.** MicroCT scans were performed at 8 weeks of age in the crossed oim/Col1a2 null line. Reconstruction and analysis of scan files enabled determination of cortical thickness (A), polar moment of inertia (B), periosteal (C) and endosteal (D) circumference, as well as bone density (E). Blue bars/triangles = males, orange bars/circles = females. Blue and orange brackets show differences between genotypes within males (blue) or females (orange). Male/female differences for particular genotypes are shown below the x-axis for females (blue stars). \* p-value < 0.05, \*\* p-value < 0.01 and \*\*\* p-value < 0.001. n=4 for all groups, except male J/N +/+ and female J/N -/oim where n=5, and male J/N +/-oim where n=6.

891

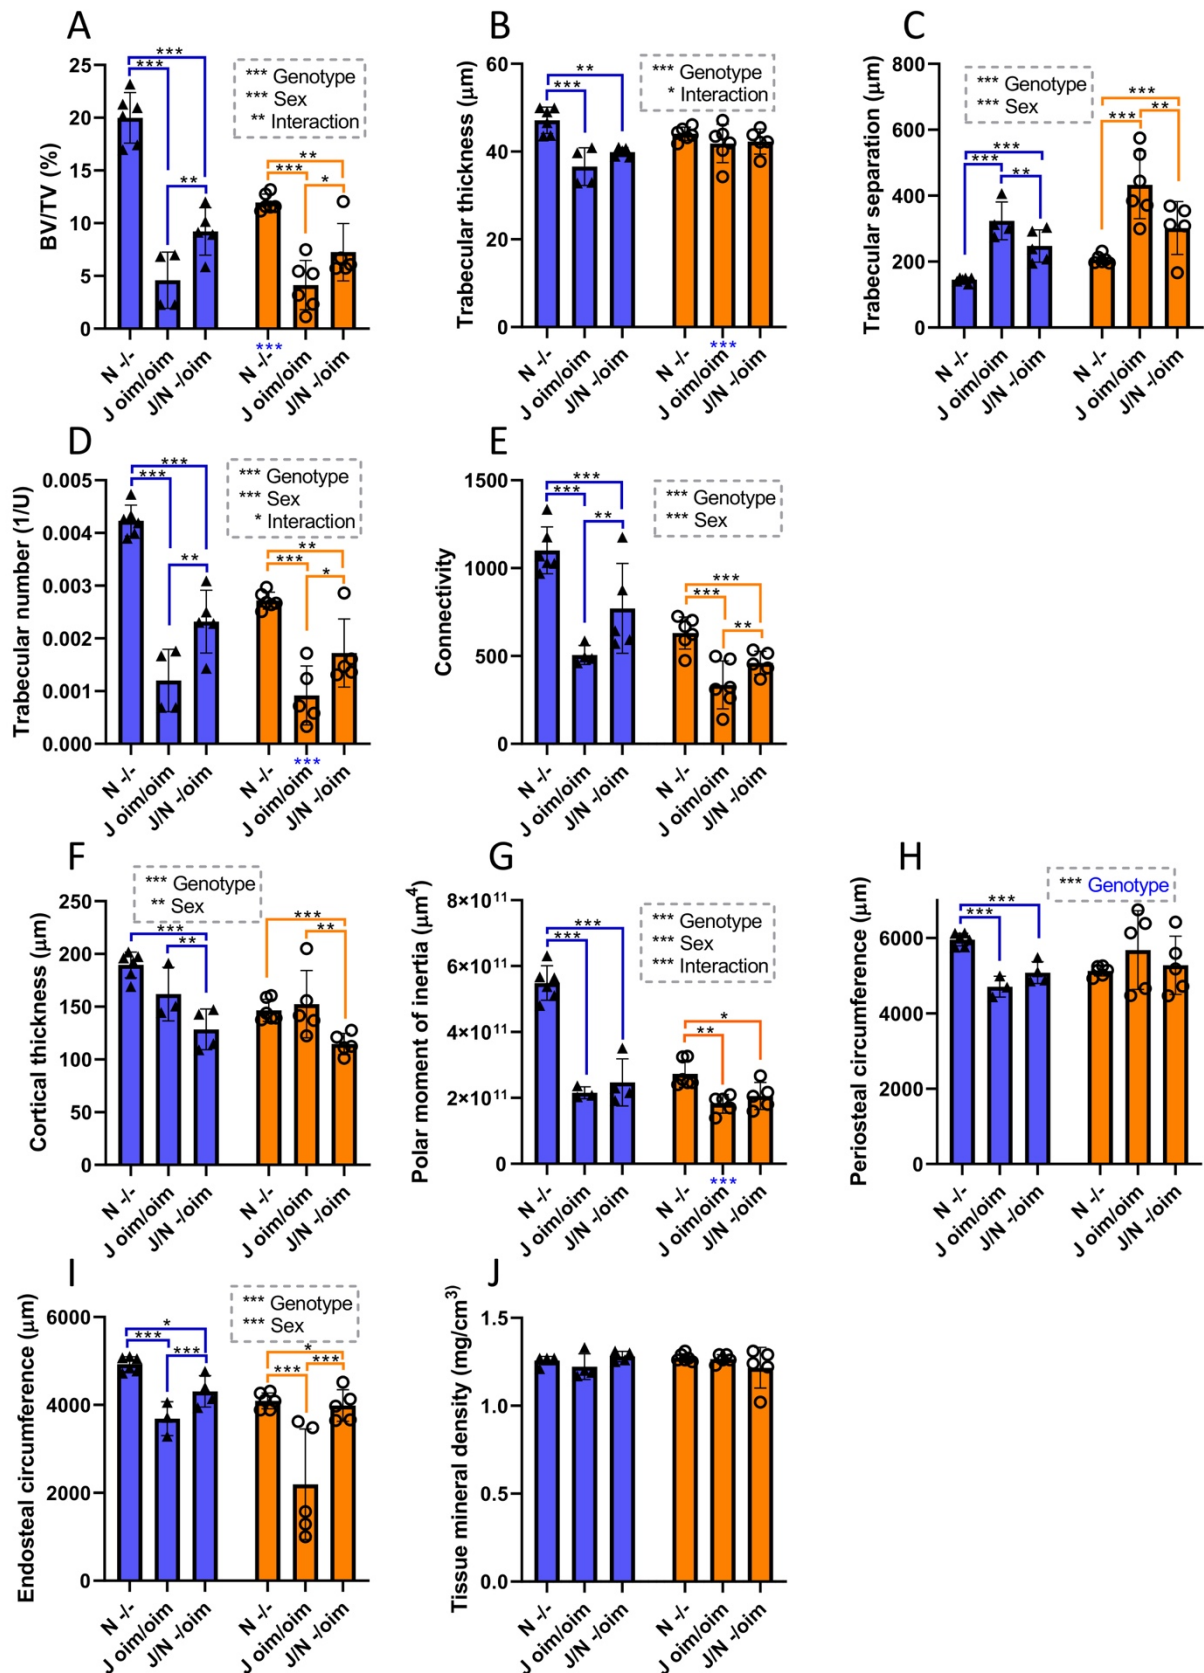

892

893

894

895

896

**Figure S2. Bone structural properties in compound heterozygotes are generally less severe than in oim homozygotes.** Bone volume (A), trabecular thickness (B), trabecular separation (C), trabecular number (D), connectivity (E), cortical thickness (F), polar moment of inertia (G), periosteal (H) and

897 endosteal (I) circumference, as well as bone density (J) comparisons are shown for Col1a2 null  
898 homozygotes (-/-), oim homozygotes (oim/oim) and compound heterozygotes (-/oim). Blue  
899 bars/triangles = males, orange bars/circles = females. Blue and orange brackets show differences  
900 between genotypes within males (blue) or females (orange). Male/female differences for particular  
901 genotypes are shown below the x-axis for females (blue stars). \* p-value < 0.05, \*\* p-value <0.01 and  
902 \*\*\* p-value <0.001. For trabecular parameters (A-E) n=6 for all groups except -/oim (both sexes) and  
903 female oim/oim in D where n=5, and for male oim/oim where n=4. For cortical parameters (F-J) n=6 for  
904 -/-, n=5 for female oim/oim and -/oim, whilst n=4 for male -/oim and n=3 for male oim/oim (except in J  
905 where n=4 for male oim/oim).  
906  
907
